# Supplementary material for: Life cycle inherent toxicity: a novel LCA-based algorithm for evaluating chemical synthesis pathways
Source: Royal Society of Chemistry journal article supplement (doi:10.1039/c5gc02768c), 2016-01-01
Supplement: c5gc02768c1.xlsx [file c5gc02768c1.xlsx]

## Sheet: Introduction
This worksheet contains Supplemental Data for the manuscript
Life Cycle Inherent Toxicity: A Novel LCA-based Algorithm for Evaluating Chemical Synthesis Pathways
Matthew J. Eckelman
Department of Civil and Environmental Engineering, Northeastern University
360 Huntington Avenue, Boston, MA 02115, USA
m.eckelman@neu.edu
+1 617 645 1016

## Sheet: Activity Coefficients
		Ecoinvent category		Activity Coeffcients
Unit Process Name	Unit	Ecocat	Ecosubcat	1,1-difluoroethane, HFC-152a, at plant	1,1-dimethylcyclopentane, from naphtha, at plant	1-butanol, propylene hydroformylation, at plant	1-pentanol, at plant	1-propanol, at plant	2,3-dimethylbutan, from naphtha, at plant	2-butanol, at plant	2-methyl-1-butanol, at plant	2-methyl-2-butanol, at plant	2-methylpentane, from naphtha, at plant	3-methyl-1-butanol, at plant	3-methyl-1-butyl acetate, at plant	4-methyl-2-pentanone, at plant	acetaldehyde, at plant	acetic anhydride from acetaldehyde, at plant	acetic anhydride from ketene, at plant	acetic anhydride, at plant	acetone cyanohydrin, at plant	acetone from butane, at plant	acetone, liquid, at plant	acetonitrile, at plant	acetylene, at regional storehouse	acrylic acid, at plant	acrylonitrile from Sohio process, at plant	adipic acid, at plant	AKD sizer, in paper production, at plant	alkylbenzene, linear, at plant	allyl chloride, from reacting propylene and chlorine, at plant	ammonium carbonate, at plant	ammonium thiocyanate, at plant	aniline, at plant	anionic resin, at plant	benzal chloride, at plant	benzaldehyde, at plant	benzene, at plant	benzyl alcohol, at plant	benzyl chloride, at plant	bisphenol A, powder, at plant	butadiene, at plant	butane-1,4-diol, at plant	butanes from butenes, at plant	butene, mixed, at plant	butyl acetate, at plant	butyl acrylate, at plant	butyrolactone	carbon disulfide, at plant
1,1-difluoroethane, HFC-152a, at plant	kg	chemicals	organics	1	4.35811e-09	5.03572e-09	1.80255e-08	3.76708e-08	4.35854e-09	7.46404e-09	1.80253e-08	5.29899e-09	4.35874e-09	1.80259e-08	2.59167e-08	1.32203e-08	1.98587e-09	1.7427e-08	3.40649e-08	3.02381e-08	6.27445e-11	5.81095e-09	3.5579e-11	6.28392e-09	6.38236e-08	6.24732e-09	6.28393e-09	3.50881e-08	1.42237e-08	4.26514e-09	3.15026e-08	1.05556e-08	1.33229e-08	1.80071e-08	1.93531e-08	3.0397e-08	5.10826e-08	1.94802e-11	3.1134e-08	2.11292e-08	2.39982e-08	1.59887e-11	3.362e-08	7.46403e-09	1.80076e-11	1.70917e-08	9.27006e-09	2.68767e-08	7.02207e-09
1,1-dimethylcyclopentane, from naphtha, at plant	kg	chemicals	organics	0	1	0	0	0	0	0	0	0	0	0	0	0	0	0	0	0	0	0	0	0	0	0	0	0	0	0	0	0	0	0	0	0	0	0	0	0	0	0	0	0	0	0	0	0	0
1-butanol, propylene hydroformylation, at plant	kg	chemicals	organics	1.71631	3.00425e-07	1	2.50737e-07	7.7156e-07	3.00454e-07	3.05028e-07	2.50736e-07	2.93433e-07	3.00469e-07	2.5074e-07	6.88186e-07	3.06581e-07	2.84646e-07	5.86739e-07	8.70177e-07	8.04986e-07	9.92392e-10	2.93255e-07	5.73134e-10	1.18857e-06	4.04423e-07	2.96649e-07	1.18857e-06	1.20128e-06	1.145e-06	4.96226e-07	6.8122e-07	1.29717e-06	1.29419e-06	1.57005e-06	7.23741e-07	6.78891e-07	1.36692e-06	3.11768e-10	1.16173e-06	5.3711e-07	9.30656e-07	2.61431e-10	6.3601e-07	3.05028e-07	2.87866e-10	0.644531	0.570001	4.91656e-07	2.9503e-07
1-pentanol, at plant	kg	chemicals	organics	1.02562e-10	1.05738e-11	1.20625e-11	1	3.36269e-11	1.05749e-11	1.88422e-11	1.92919e-11	1.3946e-11	1.05754e-11	1.92924e-11	3.43166e-11	1.39244e-11	9.54005e-12	2.70558e-11	3.77903e-11	3.53214e-11	1.7771e-13	1.11231e-11	9.19722e-14	1.40855e-11	3.2333e-11	8.98152e-12	1.40855e-11	4.71184e-11	7.93633e-08	1.50031e-11	3.02899e-11	1.6676e-11	1.96975e-11	3.47375e-11	2.31432e-11	3.02174e-11	5.82751e-11	5.26764e-14	1.11192e-10	2.29516e-11	3.08864e-11	3.92097e-14	4.10885e-11	1.88422e-11	4.87316e-14	2.90541e-11	3.06689e-11	3.1304e-11	9.69516e-12
1-propanol, at plant	kg	chemicals	organics	3.41368e-12	2.32009e-10	2.65817e-10	9.13351e-10	1	2.32032e-10	3.91884e-10	9.13341e-10	2.81579e-10	2.32043e-10	9.13371e-10	1.32456e-09	6.71656e-10	1.11703e-10	8.9903e-10	1.73001e-09	1.53888e-09	3.30983e-12	3.02119e-10	1.86892e-12	3.32392e-10	3.1819e-09	3.21712e-10	3.32392e-10	1.79211e-09	7.26866e-07	2.34716e-10	1.59104e-09	5.43025e-10	7.00743e-10	9.47645e-10	9.88065e-10	1.53522e-09	2.59404e-09	1.02541e-12	1.6446e-09	1.07066e-09	1.23279e-09	8.37967e-13	1.71164e-09	3.91883e-10	9.47874e-13	8.84171e-10	4.98913e-10	1.36764e-09	3.6145e-10
2,3-dimethylbutan, from naphtha, at plant	kg	chemicals	organics	0	0	0	0	0	1	0	0	0	0	0	0	0	0	0	0	0	0	0	0	0	0	0	0	0	0	0	0	0	0	0	0	0	0	0	0	0	0	0	0	0	0	0	0	0	0
2-butanol, at plant	kg	chemicals	organics	2.1679e-11	1.13766e-11	6.1512e-12	9.73824e-12	1.31716e-11	1.13778e-11	1	9.73809e-12	7.27618e-12	1.13783e-11	9.7383e-12	1.51417e-11	4.2734e-12	2.73808e-12	8.17005e-12	1.49104e-11	1.33601e-11	4.37478e-14	7.06081e-12	2.37913e-14	6.42283e-12	6.15848e-12	2.65873e-12	6.42329e-12	1.61254e-11	7.77354e-07	6.01342e-12	6.88822e-12	6.28205e-12	1.40141e-11	1.33717e-11	8.71043e-12	6.88063e-12	1.50211e-11	1.33042e-14	1.50766e-11	5.64686e-12	1.03114e-11	1.04355e-14	1.43442e-11	7.13252e-12	1.22898e-14	1.24702e-11	1.02682e-11	1.11205e-11	6.09747e-12
2-methyl-1-butanol, at plant	kg	chemicals	organics	0	0	0	0	0	0	0	1	0	0	0	0	0	0	0	0	0	0	0	0	0	0	0	0	0	0	0	0	0	0	0	0	0	0	0	0	0	0	0	0	0	0	0	0	0	0
2-methyl-2-butanol, at plant	kg	chemicals	organics	2.05323e-14	2.11684e-15	2.4148e-15	3.86211e-15	6.7319e-15	2.11705e-15	3.77211e-15	3.86213e-15	1	2.11715e-15	3.86225e-15	6.86999e-15	2.78757e-15	1.90987e-15	5.41643e-15	7.56541e-15	7.07112e-15	3.55767e-17	2.22679e-15	1.84124e-17	2.81984e-15	6.47289e-15	1.79805e-15	2.81981e-15	9.43285e-15	1.58878e-11	3.00349e-15	6.06396e-15	3.33844e-15	3.94333e-15	6.95427e-15	4.63315e-15	6.04933e-15	1.16664e-14	1.05456e-17	2.226e-14	4.59478e-15	6.18331e-15	7.8496e-18	8.22564e-15	3.77208e-15	9.75584e-18	5.81648e-15	6.13975e-15	6.26686e-15	1.94092e-15
2-methylpentane, from naphtha, at plant	kg	chemicals	organics	0	0	0	0	0	0	0	0	0	1	0	0	0	0	0	0	0	0	0	0	0	0	0	0	0	0	0	0	0	0	0	0	0	0	0	0	0	0	0	0	0	0	0	0	0	0
3-methyl-1-butanol, at plant	kg	chemicals	organics	0	0	0	0	0	0	0	0	0	0	1	0.71255	0	0	0	0	0	0	0	0	0	0	0	0	0	0	0	0	0	0	0	0	0	0	0	0	0	0	0	0	0	0	0	0	0	0
3-methyl-1-butyl acetate, at plant	kg	chemicals	organics	0	0	0	0	0	0	0	0	0	0	0	1	0	0	0	0	0	0	0	0	0	0	0	0	0	0	0	0	0	0	0	0	0	0	0	0	0	0	0	0	0	0	0	0	0	0
4-methyl-2-pentanone, at plant	kg	chemicals	organics	0	0	0	0	0	0	0	0	0	0	0	0	1	0	0	0	0	0	0	0	0	0	0	0	0	0	0	0	0	0	0	0	0	0	0	0	0	0	0	0	0	0	0	0	0	0
acetaldehyde, at plant	kg	chemicals	organics	2.02923e-09	3.48115e-07	3.18028e-07	4.19252e-07	7.12145e-07	3.4815e-07	3.68967e-07	4.19248e-07	3.8032e-07	3.4817e-07	4.19255e-07	8.1632e-07	3.74718e-07	1	0.938891	8.28785e-07	0.215946	4.15881e-09	2.59312e-07	2.27536e-09	4.62632e-07	4.85074e-07	2.52286e-07	4.62632e-07	1.02309e-06	3.8414e-05	5.02987e-07	5.65088e-07	3.29236e-07	1.33047e-06	1.30918e-06	6.35633e-07	4.99521e-07	1.17798e-06	1.27094e-09	1.11003e-06	4.25601e-07	1.02255e-06	1.00385e-09	9.6976e-07	3.68967e-07	1.17241e-09	7.38823e-07	6.99924e-07	8.04928e-07	2.99672e-07
acetic anhydride from acetaldehyde, at plant	kg	chemicals	organics	5.45e-07	9.85714e-08	9.54458e-08	7.44711e-08	2.36556e-07	9.85809e-08	9.8766e-08	7.4471e-08	9.5212e-08	9.85858e-08	7.4472e-08	2.17706e-07	9.72863e-08	9.39257e-08	1	2.73768e-07	0.23	2.27959e-10	9.47104e-08	1.38092e-10	1.36015e-07	1.04859e-07	9.5644e-08	1.36015e-07	3.00877e-07	2.04142e-05	1.60244e-07	2.10038e-07	1.73264e-07	1.38845e-07	3.80201e-07	2.02408e-07	2.08561e-07	4.2867e-07	7.34891e-11	3.72595e-07	1.67251e-07	3.03085e-07	6.4555e-11	2.01228e-07	9.8766e-08	6.78012e-11	2.31299e-07	2.07017e-07	1.56021e-07	9.56809e-08
acetic anhydride from ketene, at plant	kg	chemicals	organics	1.82457e-09	3.3e-07	3.19536e-07	2.49316e-07	7.9195e-07	3.30032e-07	3.30651e-07	2.49316e-07	3.18753e-07	3.30048e-07	2.49319e-07	7.28841e-07	3.25698e-07	3.14447e-07	6.41422e-07	1	0.770001	7.63167e-10	3.17074e-07	4.62308e-10	4.55356e-07	3.5105e-07	3.20199e-07	4.55356e-07	1.00728e-06	6.83431e-05	5.36469e-07	7.0317e-07	5.80059e-07	4.6483e-07	1.27285e-06	6.77628e-07	6.98226e-07	1.43511e-06	2.46029e-10	1.24738e-06	5.59928e-07	1.01468e-06	2.16119e-10	6.73677e-07	3.30651e-07	2.26987e-10	7.74349e-07	6.93055e-07	5.22332e-07	3.20323e-07
acetic anhydride, at plant	kg	chemicals	organics	2.36957e-09	4.28571e-07	4.14982e-07	3.23787e-07	1.02851e-06	4.28613e-07	4.29417e-07	3.23787e-07	4.13965e-07	4.28634e-07	3.23791e-07	9.46546e-07	4.22984e-07	4.08373e-07	8.33015e-07	1.19029e-06	1	9.91126e-10	4.11784e-07	6.004e-10	5.91372e-07	4.55909e-07	4.15843e-07	5.91372e-07	1.30816e-06	8.87573e-05	6.96713e-07	9.13208e-07	7.53324e-07	6.03675e-07	1.65305e-06	8.80037e-07	9.06787e-07	1.86378e-06	3.19518e-10	1.61998e-06	7.27179e-07	1.31776e-06	2.80674e-10	8.74905e-07	4.29417e-07	2.94788e-10	1.00565e-06	9.00072e-07	6.78353e-07	4.16004e-07
acetone cyanohydrin, at plant	kg	chemicals	organics	0	0	0	0	0	0	0	0	0	0	0	0	0	0	0	0	0	1	0	0	0	0	0	0	0	0	0	0	0	0	0	0	0	0	0	0	0	0	0	0	0	0	0	0	0	0
acetone from butane, at plant	kg	chemicals	organics	0	0	0	0	0	0	0	0	0	0	0	0	0	0	0	0	0	0	1	0	0	0	0	0	0	0	0	0	0	0	0	0	0	0	0	0	0	0	0	0	0	0	0	0	0	0
acetone, liquid, at plant	kg	chemicals	organics	3.10796e-05	3.86992e-05	9.09688e-06	2.2168e-05	2.73736e-05	3.87031e-05	1.1169e-05	2.21677e-05	1.57981e-05	3.87048e-05	2.21683e-05	2.89753e-05	1.42291	3.40401e-06	9.99375e-06	2.55092e-05	2.19406e-05	8.7176e-08	1.42776e-05	1	9.79139e-06	7.21406e-06	0.000603086	9.79139e-06	2.32033e-05	4.41155e-05	8.83446e-06	8.9583e-06	9.80591e-06	2.02213e-05	1.80415e-05	1.00692e-05	9.43195e-06	2.01503e-05	2.7218e-08	1.67146e-05	7.66099e-06	0.283011	2.2226e-08	1.97145e-05	1.1169e-05	2.48196e-08	1.95879e-05	0.000367505	1.47907e-05	1.4526e-05
acetonitrile, at plant	kg	chemicals	organics	3.7299e-10	6.7661e-11	6.11419e-11	8.14595e-11	1.48321e-10	6.76677e-11	7.38311e-11	8.14588e-11	7.09578e-11	6.76713e-11	8.14603e-11	1.58199e-10	6.86808e-11	4.56678e-11	1.37769e-10	1.68652e-10	1.61549e-10	6.24844e-13	5.45178e-11	3.40956e-13	1	1.0486e-10	4.85247e-11	8.28234e-11	2.01976e-10	4.39077e-06	8.90156e-11	1.17938e-10	7.44321e-11	1.91245e-10	2.27087e-10	1.20122e-10	1.10351e-10	2.40438e-10	1.90505e-13	2.3105e-10	9.01743e-11	1.82757e-10	1.50007e-13	1.7653e-10	7.3831e-11	1.75869e-13	1.42841e-10	1.34747e-10	1.42664e-10	5.72571e-11
acetylene, at regional storehouse	kg	chemicals	organics	4.2733e-07	4.96941e-08	4.95114e-08	5.83089e-08	1.58474e-07	4.96989e-08	5.46879e-08	5.83086e-08	4.9882e-08	4.97013e-08	5.83099e-08	1.3276e-07	6.08796e-08	4.46571e-08	1.0716e-07	1.6941e-07	1.55093e-07	2.22451e-10	5.07226e-08	1.22362e-10	6.84599e-08	1	5.11272e-08	6.84599e-08	1.82515e-07	4.73729e-07	7.79215e-08	1.37892e-07	9.32608e-08	7.12452e-08	1.9073e-07	1.20433e-07	1.36497e-07	2.62884e-07	6.79355e-11	2.08725e-07	1.04588e-07	1.65651e-07	5.39762e-11	0.32	5.46879e-08	6.28407e-11	1.26481e-07	1.04229e-07	0.221159	5.19572e-08
acrylic acid, at plant	kg	chemicals	organics	1.98184e-09	3.59423e-07	3.49054e-07	2.75251e-07	8.75869e-07	3.59458e-07	3.61722e-07	2.75251e-07	3.5044e-07	3.59475e-07	2.75255e-07	7.97138e-07	3.51588e-07	3.44715e-07	6.86433e-07	1.00428e-06	9.31172e-07	9.21782e-10	3.49028e-07	5.3462e-10	4.93003e-07	3.79528e-07	1	4.93003e-07	1.10035e-06	1.24381e-06	5.99506e-07	7.76806e-07	6.45129e-07	4.50864e-07	1.37119e-06	7.49546e-07	7.76534e-07	1.58221e-06	2.90042e-10	1.36502e-06	6.1975e-07	1.09514e-06	2.43916e-10	7.1995e-07	3.61722e-07	2.67836e-10	8.44796e-07	0.590001	5.54571e-07	3.48007e-07
acrylonitrile from Sohio process, at plant	kg	chemicals	organics	7.75739e-11	1.29778e-11	1.23358e-11	1.61979e-11	3.0183e-11	1.29791e-11	1.49363e-11	1.61978e-11	1.42932e-11	1.29798e-11	1.61979e-11	3.20256e-11	1.42424e-11	9.4912e-12	2.86279e-11	3.43309e-11	3.30194e-11	1.28731e-13	1.0769e-11	7.0259e-14	1.69925e-11	2.17895e-11	1.01211e-11	1	4.13636e-11	8.35305e-07	1.83973e-11	2.45316e-11	1.52057e-11	3.93226e-11	4.72152e-11	2.47352e-11	2.28917e-11	4.98683e-11	3.92539e-14	4.7814e-11	1.8702e-11	3.80637e-11	3.09166e-14	3.61032e-11	1.49348e-11	3.6237e-14	2.91e-11	2.76687e-11	2.92457e-11	1.15037e-11
adipic acid, at plant	kg	chemicals	organics	3.32034e-09	6.02683e-07	5.85245e-07	4.50758e-07	1.46229e-06	6.02741e-07	6.04271e-07	4.50758e-07	5.8447e-07	6.02771e-07	4.50764e-07	1.32973e-06	5.87616e-07	5.81685e-07	1.14958e-06	1.6815e-06	1.55916e-06	1.27198e-09	5.86333e-07	7.80416e-10	8.2758e-07	6.2047e-07	5.89015e-07	8.2758e-07	1	1.65376e-06	1.01126e-06	1.30149e-06	1.0861e-06	7.43533e-07	2.30642e-06	1.2577e-06	1.30194e-06	2.65427e-06	4.12993e-10	2.29326e-06	1.03973e-06	1.83974e-06	3.67304e-10	1.19692e-06	6.04271e-07	3.80946e-10	1.4172e-06	1.26534e-06	9.21208e-07	5.84273e-07
AKD sizer, in paper production, at plant	kg	chemicals	organics	4.42984e-08	4.95774e-09	5.00991e-09	8.39499e-09	1.67627e-08	4.95823e-09	6.4044e-09	8.39495e-09	5.194e-09	4.95858e-09	8.39518e-09	1.55211e-08	7.97918e-09	3.19831e-09	1.44395e-08	1.81005e-08	1.72585e-08	1.1351e-10	4.39649e-09	5.63803e-11	7.44741e-09	2.08275e-08	4.66291e-09	7.44741e-09	2.11329e-08	1	1.25379e-08	1.55656e-08	6.59202e-09	2.16895e-08	2.16233e-08	1.31039e-08	1.45892e-08	2.89215e-08	3.31142e-11	2.30039e-08	1.10841e-08	1.87992e-08	2.35168e-11	2.05901e-08	6.40442e-09	3.0538e-11	1.31483e-08	1.04121e-08	1.69361e-08	5.47759e-09
alkylbenzene, linear, at plant	kg	chemicals	organics	0	0	0	0	0	0	0	0	0	0	0	0	0	0	0	0	0	0	0	0	0	0	0	0	0	0	1	0	0	0	0	0	0	0	0	0	0	0	0	0	0	0	0	0	0	0
allyl chloride, from reacting propylene and chlorine, at plant	kg	chemicals	organics	0	0	0	0	0	0	0	0	0	0	0	0	0	0	0	0	0	0	0	0	0	0	0	0	0	0	0	1	0	0	0	0	0	0	0	0	0	0	0	0	0	0	0	0	0	0
ammonium carbonate, at plant	kg	chemicals	organics	4.68495e-09	8.50659e-07	8.26008e-07	6.3571e-07	2.06301e-06	8.50742e-07	8.52778e-07	6.3571e-07	8.24905e-07	8.50784e-07	6.35719e-07	1.90298e-06	8.29073e-07	8.21085e-07	1.62256e-06	2.44243e-06	2.25386e-06	1.79338e-09	8.27519e-07	1.10044e-09	1.16807e-06	8.73715e-07	8.31508e-07	1.16807e-06	2.59643e-06	2.54565e-06	1.42743e-06	1.83621e-06	1	1.04918e-06	3.25532e-06	1.8191e-06	1.83688e-06	3.74522e-06	5.82321e-10	3.2362e-06	1.46703e-06	2.5963e-06	5.17951e-10	1.77851e-06	8.52778e-07	5.37133e-10	2.02877e-06	1.78606e-06	1.36172e-06	8.24572e-07
ammonium thiocyanate, at plant	kg	chemicals	organics	1.18154e-10	1.24299e-11	1.39859e-11	2.23912e-11	3.88932e-11	1.24312e-11	2.17995e-11	2.2391e-11	1.61757e-11	1.24318e-11	2.23913e-11	3.97372e-11	1.60583e-11	1.09963e-11	3.11921e-11	4.37095e-11	4.08301e-11	2.0499e-13	1.29437e-11	1.06104e-13	1.62909e-11	3.72475e-11	1.03474e-11	1.62909e-11	5.44337e-11	1.10153e-07	1.73238e-11	3.48968e-11	1.92754e-11	1	4.00655e-11	2.67305e-11	3.48232e-11	6.71753e-11	6.07658e-14	1.2807e-10	2.64545e-11	3.56011e-11	4.52371e-14	4.74798e-11	2.17974e-11	5.62157e-14	3.36182e-11	3.54182e-11	3.61683e-11	1.12659e-11
aniline, at plant	kg	chemicals	organics	5.56011e-10	2.58396e-10	1.39021e-10	2.37174e-10	3.08595e-10	2.58422e-10	1.76162e-10	2.37171e-10	1.65214e-10	2.58434e-10	2.37177e-10	3.52509e-10	9.21903e-11	5.84328e-11	1.72026e-10	3.47545e-10	3.07176e-10	1.16599e-12	1.64117e-10	6.16155e-13	1.32568e-10	1.72247e-10	5.19858e-11	1.32568e-10	3.80713e-10	1.58788e-05	1.19004e-10	1.67473e-10	1.43641e-10	2.48602e-10	1	1.86304e-10	1.7357e-10	3.53643e-10	3.49207e-13	5.50814e-10	1.36506e-10	1.95448e-10	2.65743e-13	3.41406e-10	1.76161e-10	3.22938e-13	2.80116e-10	2.3884e-10	2.5779e-10	1.32749e-10
anionic resin, at plant	kg	chemicals	organics	3.67083e-07	2.70358e-08	8.06151e-07	1.08564e-06	9.94734e-07	2.70385e-08	9.66121e-06	1.08563e-06	8.74435e-07	2.70398e-08	1.08565e-06	1.01974e-06	2.39133e-07	1.31516e-08	1.47621e-06	1.13231e-06	1.2114e-06	3.88567e-10	2.44726e-06	1.9965e-10	3.26222e-06	2.52296e-07	3.11383e-08	3.26223e-06	1.94284e-07	1.03669e-07	2.60472e-08	1.36456e-07	5.06076e-08	6.14513e-08	9.23404e-08	1	1.35348e-07	2.3906e-07	1.14448e-10	1.4105e-06	9.72124e-08	1.10716e-07	8.40948e-11	1.59056e-06	9.66117e-06	1.06005e-10	7.82083e-07	4.94155e-07	1.11446e-06	3.28132e-08
benzal chloride, at plant	kg	chemicals	organics	0	0	0	0	0	0	0	0	0	0	0	0	0	0	0	0	0	0	0	0	0	0	0	0	0	0	0	0	0	0	0	0	1	1.5889	0	0	0	0	0	0	0	0	0	0	0	0
benzaldehyde, at plant	kg	chemicals	organics	0	0	0	0	0	0	0	0	0	0	0	0	0	0	0	0	0	0	0	0	0	0	0	0	0	0	0	0	0	0	0	0	0	1	0	0	0	0	0	0	0	0	0	0	0	0
benzene, at plant	kg	chemicals	organics	0.00010665	0.000107497	2.82057e-05	6.26884e-05	8.29741e-05	0.000107508	3.40133e-05	6.26878e-05	4.625e-05	0.000107513	6.26892e-05	8.65222e-05	1.84545e-05	1.27895e-05	5.19532e-05	7.93255e-05	7.30299e-05	2.74795e-07	4.2006e-05	1.505e-07	3.18505e-05	2.37231e-05	0.00161676	3.18505e-05	0.624016	0.000240726	0.34803	3.33586e-05	3.33456e-05	6.00474e-05	0.877863	3.55936e-05	3.44875e-05	7.24494e-05	1	8.13869e-05	2.77511e-05	0.839611	6.94168e-08	6.11004e-05	3.40132e-05	7.80873e-08	6.17001e-05	0.000991226	4.60472e-05	4.26836e-05
benzyl alcohol, at plant	kg	chemicals	organics	0	0	0	0	0	0	0	0	0	0	0	0	0	0	0	0	0	0	0	0	0	0	0	0	0	0	0	0	0	0	0	0	0	0	0	1	0	0	0	0	0	0	0	0	0	0
benzyl chloride, at plant	kg	chemicals	organics	2.01947e-10	9.21761e-11	4.99811e-11	8.48994e-11	1.11157e-10	9.21854e-11	6.32816e-11	8.48985e-11	5.93643e-11	9.21897e-11	8.49005e-11	1.26778e-10	3.3576e-11	2.13294e-11	6.27962e-11	1.25212e-10	1.10856e-10	4.20729e-13	5.8736e-11	2.22486e-13	4.80375e-11	6.23801e-11	1.90952e-11	4.80375e-11	1.37422e-10	5.66336e-06	4.33576e-11	6.09281e-11	5.18499e-11	9.05161e-11	8.95322e-11	6.75784e-11	6.29704e-11	1.28513e-10	1.26055e-13	1.181	1	7.176e-11	9.59994e-14	1.23131e-10	6.32814e-11	1.16568e-13	1.01018e-10	8.63377e-11	9.31101e-11	4.77073e-11
bisphenol A, powder, at plant	kg	chemicals	organics	0	0	0	0	0	0	0	0	0	0	0	0	0	0	0	0	0	0	0	0	0	0	0	0	0	0	0	0	0	0	0	0	0	0	0	0	0	1	0	0	0	0	0	0	0	0
butadiene, at plant	kg	plastics	monomers	4.15756e-05	6.22066e-05	1.33271e-05	3.53658e-05	4.09312e-05	6.22129e-05	1.67221e-05	3.53654e-05	2.44264e-05	6.22158e-05	3.53663e-05	4.4018e-05	7.23024e-06	3.90891e-06	1.31451e-05	3.72066e-05	3.16725e-05	1.42778e-07	2.18743e-05	7.7743e-08	1.24622e-05	1.00625e-05	0.000995149	1.24622e-05	3.25464e-05	3.07389e-05	1.16316e-05	1.09468e-05	1.17321e-05	2.98056e-05	2.23043e-05	1.27807e-05	1.1729e-05	2.54553e-05	4.44155e-08	2.09236e-05	9.58347e-06	1.33232e-05	1	2.91115e-05	1.6722e-05	4.05003e-08	2.82159e-05	0.000603794	2.17735e-05	2.22835e-05
butane-1,4-diol, at plant	kg	chemicals	organics	7.07265e-09	1.29299e-09	1.24897e-09	9.7012e-10	3.12192e-09	1.29311e-09	1.29065e-09	9.70121e-10	1.2486e-09	1.29318e-09	9.70135e-10	2.84112e-09	1.25245e-09	1.23666e-09	2.44843e-09	3.58811e-09	3.32599e-09	2.74806e-12	1.25293e-09	1.68283e-12	1.76293e-09	1.33193e-09	1.25271e-09	1.76293e-09	3.92527e-09	9.42258e-07	2.15149e-09	2.77197e-09	2.31221e-09	1.5926e-09	4.90702e-09	2.67954e-09	2.773e-09	5.65233e-09	8.91291e-13	4.88335e-09	2.21412e-09	3.91517e-09	7.9121e-13	1	1.29066e-09	8.22157e-13	3.02204e-09	2.69571e-09	0.69112	1.24731e-09
butanes from butenes, at plant	kg	chemicals	organics	0	0	0	0	0	0	0	0	0	0	0	0	0	0	0	0	0	0	0	0	0	0	0	0	0	0	0	0	0	0	0	0	0	0	0	0	0	0	0	0	1	0	0	0	0	0
butene, mixed, at plant	kg	plastics	monomers	1.16097e-09	2.02125e-07	1.96493e-07	0.61613	5.21263e-07	2.02145e-07	0.88462	0.61612	1.96053e-07	2.02154e-07	0.61614	0.439031	2.0701e-07	1.92677e-07	3.95754e-07	5.88212e-07	5.43947e-07	5.77718e-10	1.9794e-07	3.51771e-10	9.12026e-07	2.76154e-07	2.01206e-07	9.12026e-07	8.46023e-07	2.21569e-06	3.35881e-07	4.61877e-07	9.83865e-07	9.97308e-07	1.12058e-06	5.01001e-07	4.60433e-07	9.25746e-07	1.86971e-10	7.86255e-07	3.63988e-07	6.29557e-07	1.65377e-10	4.27646e-07	0.88462	1	4.81841e-07	4.2513e-07	3.30471e-07	1.99327e-07
butyl acetate, at plant	kg	chemicals	organics	0	0	0	0	0	0	0	0	0	0	0	0	0	0	0	0	0	0	0	0	0	0	0	0	0	0	0	0	0	0	0	0	0	0	0	0	0	0	0	0	0	0	1	0	0	0
butyl acrylate, at plant	kg	chemicals	organics	4.67908e-07	8.42411e-08	8.18747e-08	7.42317e-08	2.11413e-07	8.42493e-08	8.68291e-08	7.42315e-08	8.49067e-08	8.42535e-08	7.42327e-08	1.93216e-07	8.42785e-08	7.75546e-08	1.62334e-07	2.38005e-07	2.20601e-07	4.5574e-10	8.08986e-08	2.27103e-10	1.14764e-07	1.04097e-07	7.99303e-08	1.14764e-07	2.62701e-07	7.6792e-07	1.35215e-07	1.83465e-07	1.47478e-07	1.16718e-07	3.15128e-07	1.75147e-07	1.82588e-07	3.70475e-07	1.32273e-10	3.16514e-07	1.45092e-07	2.53932e-07	9.38076e-11	1.78258e-07	8.68291e-08	1.2252e-10	1.97591e-07	1	1.38001e-07	8.09853e-08
butyrolactone	kg	chemicals	organics	1.02336e-08	1.87086e-09	1.80717e-09	1.40369e-09	4.51719e-09	1.87104e-09	1.86748e-09	1.40369e-09	1.80663e-09	1.87113e-09	1.40371e-09	4.11089e-09	1.8122e-09	1.78935e-09	3.54269e-09	5.19174e-09	4.81246e-09	3.97624e-12	1.81289e-09	2.43493e-12	2.55082e-09	1.9272e-09	1.81257e-09	2.55083e-09	5.67959e-09	1.36338e-06	3.11304e-09	4.01083e-09	3.3456e-09	2.30438e-09	7.10009e-09	3.87709e-09	4.01232e-09	8.17851e-09	1.28963e-12	7.06586e-09	3.20367e-09	5.66497e-09	1.14482e-12	3.70247e-09	1.86749e-09	1.1896e-12	4.37266e-09	3.9005e-09	1	1.80476e-09
carbon disulfide, at plant	kg	chemicals	organics	5.32989e-12	5.32649e-10	6.16565e-10	9.9362e-10	1.7385e-09	5.32701e-10	9.7513e-10	9.93611e-10	7.10597e-10	5.32728e-10	9.93634e-10	1.76302e-09	7.12429e-10	4.90622e-10	1.37793e-09	1.95108e-09	1.81925e-09	9.64759e-12	5.71939e-10	5.02922e-12	7.1231e-10	1.69456e-09	4.58939e-10	7.1231e-10	2.43224e-09	6.49113e-07	7.58072e-10	1.57532e-09	8.6607e-10	0.52632	1.7403e-09	1.18818e-09	1.57773e-09	3.02039e-09	2.8693e-12	5.86029e-09	1.19362e-09	1.5618e-09	2.15271e-12	2.11425e-09	9.75126e-10	2.6547e-12	1.48899e-09	1.57805e-09	1.60409e-09	1
carbon tetrachloride, at plant	kg	chemicals	organics	7.43791e-09	4.8152e-09	2.65006e-09	3.96551e-09	5.71546e-09	4.81569e-09	1.63201e-08	3.96547e-09	2.98433e-09	4.81591e-09	3.96556e-09	5.39809e-09	1.74582e-09	9.00735e-10	4.30208e-09	5.89417e-09	5.52799e-09	1.891e-10	5.53537e-09	1.17679e-10	6.35308e-09	2.66869e-09	5.64669e-09	6.35311e-09	4.53224e-09	2.28462e-06	1.76415e-09	1.02869e-05	2.07156e-09	2.62378e-09	4.02578e-09	2.46397e-06	9.26614e-06	1.4724e-05	6.20054e-11	6.95237e-06	5.88371e-06	3.28176e-09	5.61066e-11	5.91248e-09	1.632e-08	5.71641e-11	4.39369e-09	6.02314e-09	4.35882e-09	1.77881e-09
cationic resin, at plant	kg	chemicals	organics	0.00040021	3.31935e-08	1.74203e-06	2.28592e-06	2.00935e-06	3.31968e-08	2.12563e-05	2.28589e-06	1.88473e-06	3.31983e-08	2.28594e-06	2.09455e-06	4.58017e-07	1.89412e-08	3.16775e-06	2.31943e-06	2.51454e-06	4.02421e-10	5.36318e-06	2.08016e-10	7.16771e-06	2.58514e-07	3.87376e-08	7.16774e-06	2.12689e-07	1.20098e-07	3.61345e-08	1.49428e-07	6.14371e-08	6.89743e-08	1.15333e-07	9.95984e-06	1.48324e-07	2.6552e-07	1.18907e-10	2.94902e-06	1.07575e-07	1.29047e-07	8.8002e-11	3.3125e-06	2.12562e-05	1.10119e-10	1.62082e-06	1.03793e-06	2.30548e-06	3.86743e-08
chemicals organic, at plant	kg	chemicals	organics	0.000484671	0.000749376	0.000158034	0.000424511	0.000486892	0.000749452	0.000198648	0.000424506	0.000292091	0.000749486	0.000424517	0.000524731	8.41221e-05	4.44005e-05	0.000152645	0.000440837	0.000374553	1.68761e-06	0.000261574	9.22125e-07	0.000146505	0.000117012	0.0120376	0.000146505	0.000383234	0.000354367	0.000135495	0.000125308	0.000136597	0.00035571	0.000258158	0.000148049	0.000134808	0.000293623	5.26226e-07	0.00024018	0.000110335	0.000151639	4.28422e-07	0.000344661	0.000198648	4.79664e-07	0.000333704	0.00729842	0.00025758	0.000266569
chloroacetic acid, at plant	kg	chemicals	organics	0	0	0	0	0	0	0	0	0	0	0	0	0	0	0	0	0	0	0	0	0	0	0	0	0	0	0	0	0	0	0	0	0	0	0	0	0	0	0	0	0	0	0	0	0	0
chlorodifluoromethane, at plant	kg	chemicals	organics	9.81907e-08	1.75666e-08	1.71196e-08	1.36735e-08	4.35562e-08	1.75683e-08	1.81493e-08	1.36735e-08	1.71091e-08	1.75692e-08	1.36737e-08	3.9338e-08	1.74324e-08	1.68806e-08	3.38713e-08	4.978e-08	4.6121e-08	3.8936e-11	1.72507e-08	2.37715e-11	2.42763e-08	2.00512e-08	1.72333e-08	2.42763e-08	5.4356e-08	4.50077e-08	2.93734e-08	3.8666e-08	3.17448e-08	2.19349e-08	6.72668e-08	3.71974e-08	3.86425e-08	7.84195e-08	1.26062e-11	6.73776e-08	3.07555e-08	5.39753e-08	1.11578e-11	3.57788e-08	1.81493e-08	1.16295e-11	4.15646e-08	3.69059e-08	2.75651e-08	1.71224e-08
chloromethyl methyl ether, at plant	kg	chemicals	organics	7.04798e-08	5.19087e-09	1.54781e-07	2.08443e-07	1.90989e-07	5.19139e-09	1.85495e-06	2.0844e-07	1.67891e-07	5.19163e-09	2.08445e-07	1.9579e-07	4.59135e-08	2.52511e-09	2.83432e-07	2.17403e-07	2.32589e-07	7.46049e-11	4.69874e-07	3.83328e-11	6.26346e-07	4.84409e-08	5.97856e-09	6.26348e-07	3.73026e-08	1.99045e-08	5.00107e-09	2.61996e-08	9.71667e-09	1.17987e-08	1.77294e-08	0.192001	2.59868e-08	4.58994e-08	2.1974e-11	2.70816e-07	1.86648e-08	2.12575e-08	1.61462e-11	3.05387e-07	1.85495e-06	2.0353e-11	1.5016e-07	9.48778e-08	2.13977e-07	6.30013e-09
cumene, at plant	kg	chemicals	organics	8.54607e-05	5.9406e-05	1.95137e-05	3.59478e-05	5.5096e-05	5.9412e-05	2.27029e-05	3.59474e-05	2.86686e-05	5.94147e-05	3.59482e-05	5.57918e-05	1.47139e-05	1.16e-05	2.79023e-05	5.51765e-05	4.89034e-05	1.78547e-07	2.63724e-05	9.76126e-08	2.36758e-05	1.78953e-05	0.000815315	2.36758e-05	0.480808	0.000268608	2.43229e-05	2.94353e-05	2.65707e-05	3.78556e-05	5.27496e-05	2.96729e-05	2.98708e-05	6.16595e-05	5.52654e-08	8.25259e-05	2.38305e-05	1.22748	4.45882e-08	4.20482e-05	2.27029e-05	5.06199e-08	4.38797e-05	0.000508197	3.1915e-05	2.67265e-05
cyclohexane, at plant	kg	chemicals	organics	0	0	0	0	0	0	0	0	0	0	0	0	0	0	0	0	0	0	0	0	0	0	0	0	0	0	0	0	0	0	0	0	0	0	0	0	0	0	0	0	0	0	0	0	0	0
cyclohexanol, at plant	kg	chemicals	organics	3.90757e-09	6.98747e-07	6.78799e-07	5.4134e-07	1.73314e-06	6.98814e-07	7.02831e-07	5.41339e-07	6.77672e-07	6.98849e-07	5.41347e-07	1.56211e-06	6.93446e-07	6.71478e-07	1.34533e-06	1.97925e-06	1.83345e-06	1.65909e-09	6.81386e-07	1.0147e-09	1.73611e-06	8.02623e-07	6.87409e-07	1.73611e-06	0.749002	1.87839e-06	1.16848e-06	1.54003e-06	2.01766e-06	1.7775e-06	3.09894e-06	1.55514e-06	1.5386e-06	3.12092e-06	5.37959e-10	2.67964e-06	1.22418e-06	2.1484e-06	4.77358e-10	1.41976e-06	7.02831e-07	4.96188e-10	1.65113e-06	1.46797e-06	1.09435e-06	6.81547e-07
cyclohexanone, at plant	kg	chemicals	organics	0	0	0	0	0	0	0	0	0	0	0	0	0	0	0	0	0	0	0	0	0	0	0	0	0	0	0	0	0	0	0	0	0	0	0	0	0	0	0	0	0	0	0	0	0	0
dichloromethane, at plant	kg	chemicals	organics	1.42113e-09	2.474e-07	2.40517e-07	2.03819e-07	6.38052e-07	2.47424e-07	2.50324e-07	2.03818e-07	2.3998e-07	2.47437e-07	2.03822e-07	5.66324e-07	2.53398e-07	2.35847e-07	4.84439e-07	7.20002e-07	6.65822e-07	7.07226e-10	2.42282e-07	4.30615e-10	1.11633e-06	3.3804e-07	2.46288e-07	1.11633e-06	1.03557e-06	2.94329e-06	4.11138e-07	5.65366e-07	1.20426e-06	1.22075e-06	1.37165e-06	6.1325e-07	5.63595e-07	1.13317e-06	2.28881e-10	9.62439e-07	4.45542e-07	7.70625e-07	2.0244e-10	5.23478e-07	2.50324e-07	2.11094e-10	5.89799e-07	5.20389e-07	4.0453e-07	2.43984e-07
dichloropropene, from reacting propylene and chlorine, at plant	kg	chemicals	organics	0	0	0	0	0	0	0	0	0	0	0	0	0	0	0	0	0	0	0	0	0	0	0	0	0	0	0	0	0	0	0	0	0	0	0	0	0	0	0	0	0	0	0	0	0	0
diethanolamine, at plant	kg	chemicals	organics	0	0	0	0	0	0	0	0	0	0	0	0	0	0	0	0	0	0	0	0	0	0	0	0	0	0	0	0	0	0	0	0	0	0	0	0	0	0	0	0	0	0	0	0	0	0
diethyl ether, at plant	kg	chemicals	organics	0	0	0	0	0	0	0	0	0	0	0	0	0	0	0	0	0	0	0	0	0	0	0	0	0	0	0	0	0	0	0	0	0	0	0	0	0	0	0	0	0	0	0	0	0	0
diethylene glycol, at plant	kg	chemicals	organics	0	0	0	0	0	0	0	0	0	0	0	0	0	0	0	0	0	0	0	0	0	0	0	0	0	0	0	0	0	0	0	0	0	0	0	0	0	0	0	0	0	0	0	0	0	0
dimethyl ether, at plant	kg	chemicals	organics	1.73737e-10	4.51235e-11	3.25397e-11	4.80368e-11	7.65548e-11	4.5128e-11	4.01626e-11	4.80364e-11	3.8105e-11	4.51302e-11	4.80374e-11	8.36641e-11	3.09345e-11	2.0322e-11	6.08894e-11	8.67387e-11	8.07934e-11	3.11974e-13	3.25596e-11	1.68302e-13	3.90979e-11	5.03652e-11	2.06674e-11	3.90979e-11	1.00816e-10	2.83118e-06	3.99477e-11	5.4127e-11	3.7416e-11	8.48281e-11	9.65495e-11	5.62665e-11	5.21888e-11	1.11311e-10	9.45135e-14	1.27322e-10	4.21218e-11	7.77217e-11	7.35351e-14	8.88822e-11	4.01626e-11	8.73049e-14	7.21154e-11	6.58997e-11	7.01755e-11	3.06453e-11
dimethyl sulfoxide, at plant	kg	chemicals	organics	0	0	0	0	0	0	0	0	0	0	0	0	0	0	0	0	0	0	0	0	0	0	0	0	0	0	0	0	0	0	0	0	0	0	0	0	0	0	0	0	0	0	0	0	0	0
dimethyl sulphate, at plant	kg	chemicals	organics	4.50095e-10	1.169e-10	8.42998e-11	1.24448e-10	1.98328e-10	1.16912e-10	1.04048e-10	1.24447e-10	9.87176e-11	1.16918e-10	1.24449e-10	2.16746e-10	8.01412e-11	5.26476e-11	1.57745e-10	2.24712e-10	2.09309e-10	8.08222e-13	8.43514e-11	4.36016e-13	1.0129e-10	1.3048e-10	5.35424e-11	1.0129e-10	2.61182e-10	7.33465e-06	1.03491e-10	1.40225e-10	9.69327e-11	2.19762e-10	2.50128e-10	1.45768e-10	1.35204e-10	2.8837e-10	2.44854e-13	3.29849e-10	1.09124e-10	2.01351e-10	1.90505e-13	2.30265e-10	1.04048e-10	2.26179e-13	1.86827e-10	1.70725e-10	1.81802e-10	7.93919e-11
dimethylacetamide, at plant	kg	chemicals	organics	0	0	0	0	0	0	0	0	0	0	0	0	0	0	0	0	0	0	0	0	0	0	0	0	0	0	0	0	0	0	0	0	0	0	0	0	0	0	0	0	0	0	0	0	0	0
dimethylamine borane, at plant	kg	chemicals	organics	0	0	0	0	0	0	0	0	0	0	0	0	0	0	0	0	0	0	0	0	0	0	0	0	0	0	0	0	0	0	0	0	0	0	0	0	0	0	0	0	0	0	0	0	0	0
dimethylamine, at plant	kg	chemicals	organics	4.04743e-12	7.09124e-10	6.93761e-10	5.70745e-10	1.74562e-09	7.09193e-10	7.37403e-10	5.70744e-10	7.00059e-10	7.09228e-10	5.70752e-10	1.60132e-09	7.04045e-10	6.79786e-10	1.37661e-09	2.00357e-09	1.85937e-09	2.04419e-12	6.91089e-10	1.19606e-12	9.71596e-10	8.05894e-10	6.87039e-10	9.71596e-10	2.21249e-09	8.68174e-07	1.17851e-09	1.55275e-09	1.26464e-09	9.12496e-10	2.69396e-09	1.48185e-09	1.55174e-09	3.15488e-09	6.46613e-13	2.91175e-09	1.23569e-09	2.15957e-09	5.48976e-13	1.47836e-09	7.37403e-10	5.96894e-13	1.67931e-09	1.5143e-09	1.138e-09	6.85109e-10
dioxane, at plant	kg	chemicals	organics	0	0	0	0	0	0	0	0	0	0	0	0	0	0	0	0	0	0	0	0	0	0	0	0	0	0	0	0	0	0	0	0	0	0	0	0	0	0	0	0	0	0	0	0	0	0
dipropylene glycol monomethyl ether, at plant	kg	chemicals	organics	1.06808e-05	1.92591e-06	1.87151e-06	1.46481e-06	4.71765e-06	1.9261e-06	1.93606e-06	1.46481e-06	1.86946e-06	1.92619e-06	1.46483e-06	4.27614e-06	1.89259e-06	1.85514e-06	3.68861e-06	5.40956e-06	5.01374e-06	4.15256e-09	1.87626e-06	2.54304e-09	2.64508e-06	2.08085e-06	1.88553e-06	2.64508e-06	5.91614e-06	4.92233e-06	3.22651e-06	4.19552e-06	3.47517e-06	2.38912e-06	7.37252e-06	4.03603e-06	4.19513e-06	8.53458e-06	1.34683e-09	7.35199e-06	3.34501e-06	5.89669e-06	1.19565e-09	3.86605e-06	1.93606e-06	1.24238e-09	4.54006e-06	4.04363e-06	2.97716e-06	1.87171e-06
DTPA, diethylenetriaminepentaacetic acid, at plant	kg	chemicals	organics	0	0	0	0	0	0	0	0	0	0	0	0	0	0	0	0	0	0	0	0	0	0	0	0	0	0	0	0	0	0	0	0	0	0	0	0	0	0	0	0	0	0	0	0	0	0
EDTA, ethylenediaminetetraacetic acid, at plant	kg	chemicals	organics	4.30593e-12	4.5637e-10	4.98825e-10	8.0912e-10	1.43837e-09	4.56415e-10	7.38386e-10	8.09112e-10	5.54007e-10	4.56443e-10	8.09131e-10	1.45861e-09	6.57802e-10	3.66335e-10	1.28392e-09	1.61975e-09	1.54251e-09	7.78718e-12	4.37361e-10	3.63184e-12	6.51046e-10	1.5616e-09	3.93914e-10	6.51046e-10	2.00092e-09	3.82595e-09	9.51632e-10	1.27507e-09	6.41942e-10	1.47418e-09	1.72787e-09	9.64061e-10	1.23929e-09	2.46613e-09	2.20192e-12	2.15209e-09	9.51769e-10	1.49428e-09	1.4476e-12	1.8823e-09	7.38382e-10	2.03337e-12	1.23541e-09	1.23175e-09	1.4879e-09	4.50382e-10
epichlorohydrin, from hypochlorination of allyl chloride, at plant	kg	chemicals	organics	0	0	0	0	0	0	0	0	0	0	0	0	0	0	0	0	0	0	0	0	0	0	0	0	0	0	0	0	0	0	0	0	0	0	0	0	0	0	0	0	0	0	0	0	0	0
epoxy resin insulator (Al2O3), at plant	kg	plastics	monomers	0	0	0	0	0	0	0	0	0	0	0	0	0	0	0	0	0	0	0	0	0	0	0	0	0	0	0	0	0	0	0	0	0	0	0	0	0	0	0	0	0	0	0	0	0	0
epoxy resin insulator (SiO2), at plant	kg	plastics	monomers	1.56996e-05	2.85013e-06	2.76761e-06	2.1308e-06	6.91379e-06	2.85041e-06	2.85742e-06	2.1308e-06	2.76392e-06	2.85055e-06	2.13083e-06	6.28743e-06	2.77838e-06	2.75096e-06	5.43593e-06	7.95073e-06	7.37233e-06	6.01135e-09	2.77272e-06	3.68851e-09	3.91368e-06	2.93092e-06	2.7854e-06	3.91368e-06	8.70073e-06	7.27677e-06	4.78251e-06	6.15362e-06	5.13611e-06	3.51575e-06	1.09072e-05	5.94721e-06	6.15582e-06	1.25504e-05	1.95188e-09	1.08437e-05	4.91618e-06	8.6997e-06	1.73607e-09	5.65886e-06	2.85742e-06	1.80042e-09	6.70167e-06	5.98383e-06	4.35528e-06	2.76293e-06
epoxy resin, liquid, at plant	kg	plastics	monomers	1.44248e-05	2.59262e-06	2.79917e-06	2.30588e-06	6.49657e-06	2.59287e-06	2.89878e-06	2.30587e-06	2.64271e-06	2.593e-06	2.30591e-06	6.14126e-06	2.63493e-06	2.43222e-06	5.04462e-06	7.65398e-06	7.05383e-06	1.40556e-08	2.54796e-06	6.77637e-09	3.65242e-06	3.2851e-06	2.4852e-06	3.65242e-06	8.49983e-06	6.64835e-06	4.24553e-06	5.71977e-06	4.74952e-06	3.77688e-06	9.80454e-06	5.69969e-06	5.73177e-06	1.16314e-05	4.01058e-09	1.0185e-05	4.55701e-06	7.95378e-06	2.72837e-09	5.96089e-06	2.89878e-06	3.7178e-09	6.44691e-06	5.64442e-06	4.58375e-06	2.70843e-06
ethanol from ethylene, at plant	kg	chemicals	organics	1.24168e-07	2.27476e-08	2.19107e-08	1.71768e-08	5.48272e-08	2.27499e-08	2.26877e-08	1.71768e-08	2.19254e-08	2.2751e-08	1.71771e-08	4.99348e-08	2.19817e-08	2.16245e-08	0.00516669	6.29861e-08	0.00118839	4.96653e-11	2.19911e-08	3.02916e-11	3.08821e-08	2.36469e-08	2.19157e-08	3.08821e-08	6.8919e-08	2.63322e-05	3.76138e-08	4.86069e-08	4.0463e-08	2.81025e-08	8.58758e-08	4.69473e-08	4.86172e-08	9.90705e-08	1.60715e-11	8.58607e-08	3.88073e-08	6.85585e-08	1.42113e-11	4.50762e-08	2.26877e-08	1.48262e-11	5.29976e-08	4.7263e-08	3.46983e-08	2.18803e-08
ethyl acetate from butane, at plant	kg	chemicals	organics	1.7825e-05	3.23466e-06	3.14115e-06	2.4208e-06	7.85119e-06	3.23498e-06	3.24346e-06	2.42079e-06	3.137e-06	3.23513e-06	2.42083e-06	7.13848e-06	3.15475e-06	3.12173e-06	6.17088e-06	9.02715e-06	8.3702e-06	6.8315e-09	3.14708e-06	4.19124e-09	4.44175e-06	3.33646e-06	3.16154e-06	4.44175e-06	9.8783e-06	8.25905e-06	5.42723e-06	6.98761e-06	5.82951e-06	3.99144e-06	1.2379e-05	6.75133e-06	6.98991e-06	1.42491e-05	2.21803e-09	1.23092e-05	5.58177e-06	9.87525e-06	1.97257e-09	6.42658e-06	3.24346e-06	2.04592e-09	7.607e-06	6.79116e-06	4.94632e-06	3.13616e-06
ethyl acetate, at plant	kg	chemicals	organics	4.78868e-12	9.40703e-10	8.58499e-10	7.29294e-10	2.11087e-09	9.40795e-10	9.03199e-10	7.29292e-10	8.68531e-10	9.4084e-10	7.29303e-10	1.97415e-09	8.51393e-10	8.08373e-10	0.0083333	2.4385e-09	0.00191666	2.42502e-12	8.64503e-10	1.42794e-12	1.19261e-09	9.5085e-10	8.19527e-10	1.19261e-09	2.6787e-09	7.49671e-06	1.38782e-09	1.82444e-09	1.50855e-09	1.26663e-09	3.27399e-09	1.76968e-09	1.81532e-09	3.72914e-09	7.69611e-13	3.35546e-09	1.45443e-09	2.61033e-09	6.57374e-13	1.83086e-09	9.03198e-10	7.10398e-13	2.05383e-09	1.83232e-09	1.41605e-09	8.57653e-10
ethyl benzene, at plant	kg	chemicals	organics	2.56542e-05	3.77161e-05	8.14214e-06	2.14293e-05	2.49825e-05	3.772e-05	1.01826e-05	2.1429e-05	1.48445e-05	3.77217e-05	2.14296e-05	2.68027e-05	4.45942e-06	2.45582e-06	8.11656e-06	2.27617e-05	1.93933e-05	8.50867e-08	1.33209e-05	4.65364e-08	8.4415e-06	6.1885e-06	0.000602125	8.4415e-06	2.0197e-05	1.83581e-05	7.18579e-06	6.83062e-06	8.03403e-06	1.90061e-05	1.42794e-05	8.01555e-06	7.30383e-06	1.5814e-05	2.65399e-08	1.2971e-05	5.96218e-06	8.35241e-06	2.16233e-08	1.77563e-05	1.01826e-05	2.41941e-08	1.72748e-05	0.000365441	1.32834e-05	1.35724e-05
ethylene carbonate, at plant	kg	chemicals	organics	0	0	0	0	0	0	0	0	0	0	0	0	0	0	0	0	0	0	0	0	0	0	0	0	0	0	0	0	0	0	0	0	0	0	0	0	0	0	0	0	0	0	0	0	0	0
ethylene dichloride, at plant	kg	chemicals	organics	2.52516e-05	3.76926e-05	8.02992e-06	2.1512e-05	2.49055e-05	3.76964e-05	1.00985e-05	2.15118e-05	1.47537e-05	3.76982e-05	2.15123e-05	2.66925e-05	4.39319e-06	2.29262e-06	7.92539e-06	2.25946e-05	1.92207e-05	8.6041e-08	1.32229e-05	4.70815e-08	7.48048e-06	6.52135e-06	0.000602032	7.48048e-06	1.97228e-05	4.29613e-05	6.91617e-06	6.68533e-06	7.04526e-06	1.802e-05	1.32945e-05	7.76325e-06	7.15317e-06	1.54245e-05	2.68367e-08	1.2528e-05	5.81773e-06	7.97695e-06	2.1868e-08	1.77271e-05	1.00985e-05	2.44687e-08	1.70316e-05	0.000365178	1.32651e-05	1.34636e-05
ethylene glycol diethyl ether, at plant	kg	chemicals	organics	0	0	0	0	0	0	0	0	0	0	0	0	0	0	0	0	0	0	0	0	0	0	0	0	0	0	0	0	0	0	0	0	0	0	0	0	0	0	0	0	0	0	0	0	0	0
ethylene glycol dimethyl ether, at plant	kg	chemicals	organics	0	0	0	0	0	0	0	0	0	0	0	0	0	0	0	0	0	0	0	0	0	0	0	0	0	0	0	0	0	0	0	0	0	0	0	0	0	0	0	0	0	0	0	0	0	0
ethylene glycol monoethyl ether, at plant	kg	chemicals	organics	0	0	0	0	0	0	0	0	0	0	0	0	0	0	0	0	0	0	0	0	0	0	0	0	0	0	0	0	0	0	0	0	0	0	0	0	0	0	0	0	0	0	0	0	0	0
ethylene glycol, at plant	kg	chemicals	organics	4.4353e-05	4.24949e-05	1.55882e-05	2.81866e-05	3.49822e-05	4.24992e-05	1.81894e-05	2.81863e-05	2.05973e-05	4.25011e-05	2.8187e-05	3.98381e-05	9.63494e-06	5.78735e-06	1.60236e-05	3.73862e-05	3.24728e-05	2.0029e-06	1.74807e-05	7.73707e-07	1.52888e-05	1.17089e-05	0.000605425	1.52888e-05	3.76696e-05	2.94413e-05	1.28806e-05	1.52962e-05	1.57685e-05	2.96983e-05	2.77775e-05	2.24352e-05	1.59139e-05	3.34671e-05	5.13835e-07	2.73245e-05	1.29209e-05	2.01343e-05	2.50237e-07	3.36125e-05	1.81894e-05	4.7853e-07	3.0576e-05	0.000376374	2.52339e-05	1.93662e-05
ethylene oxide, at plant	kg	chemicals	organics	5.83437e-05	6.86011e-05	1.95359e-05	4.19194e-05	5.05643e-05	6.8608e-05	2.3464e-05	4.19189e-05	2.98667e-05	6.86112e-05	4.19199e-05	5.58859e-05	1.15373e-05	6.75037e-06	1.99201e-05	5.01266e-05	4.31791e-05	1.53588e-06	2.6085e-05	6.06993e-07	1.8884e-05	1.47507e-05	0.00104073	1.8884e-05	4.75443e-05	5.77706e-05	1.66936e-05	1.81275e-05	0.00462064	3.97394e-05	3.43792e-05	2.43989e-05	1.90491e-05	4.05059e-05	3.98743e-07	3.3157e-05	1.54971e-05	2.32528e-05	2.02898e-07	4.23039e-05	2.3464e-05	3.70823e-07	3.96682e-05	0.00063827	3.1715e-05	2.77003e-05
ethylene, average, at plant	kg	plastics	monomers	0.000103453	0.000129497	3.27002e-05	7.6574e-05	0.506006	0.00012951	3.99348e-05	7.65732e-05	5.40794e-05	0.000129516	7.6575e-05	9.9827e-05	1.91978e-05	0.670011	0.632304	8.78498e-05	0.145498	1.4399e-06	4.78944e-05	5.94651e-07	3.19022e-05	2.57124e-05	0.00200487	3.19022e-05	8.08367e-05	0.000172582	2.91734e-05	3.03622e-05	0.00382785	6.97385e-05	5.90197e-05	3.75676e-05	3.19591e-05	6.83335e-05	3.82597e-07	5.61624e-05	2.59985e-05	3.84694e-05	2.10708e-07	7.14095e-05	3.99347e-05	3.54868e-07	6.82162e-05	0.00122397	5.35921e-05	4.97325e-05
ethylene, pipeline system, at plant	kg	plastics	monomers	0	0	0	0	0	0	0	0	0	0	0	0	0	0	0	0	0	0	0	0	0	0	0	0	0	0	0	0	0	0	0	0	0	0	0	0	0	0	0	0	0	0	0	0	0	0
ethylenediamine, at plant	kg	chemicals	organics	5.88431e-07	1.29377e-07	7.41201e-08	1.65595e-07	3.24211e-07	1.2939e-07	9.60274e-08	1.65593e-07	8.62164e-08	1.29396e-07	1.65598e-07	2.63585e-07	1.08143e-07	4.19619e-08	1.6943e-07	3.19506e-07	2.84989e-07	9.59868e-10	8.33403e-08	5.63721e-10	8.9726e-08	3.87706e-07	8.87276e-08	8.9726e-08	3.24324e-07	1.44962e-05	8.17432e-08	2.42729e-07	1.24504e-07	1.35535e-07	2.23424e-07	2.08562e-07	2.38604e-07	4.29647e-07	3.03693e-10	3.00007e-07	1.73976e-07	2.28309e-07	2.58343e-10	2.85591e-07	9.60272e-08	2.80594e-10	2.00258e-07	1.4853e-07	2.2319e-07	7.8123e-08
fatty acids, from vegetarian oil, at plant	kg	chemicals	organics	1.95234e-07	2.63897e-07	1.10753e-07	2.01482e-07	2.16749e-07	2.63924e-07	1.26175e-07	2.0148e-07	1.33104e-07	2.63936e-07	2.01485e-07	2.66421e-07	4.47764e-08	2.18968e-08	7.55744e-08	2.43366e-07	2.04774e-07	6.31501e-10	1.47429e-07	3.32901e-10	9.00218e-08	6.92706e-08	1.54823e-08	9.00219e-08	2.39824e-07	1.05	7.20226e-08	6.09237e-08	9.23782e-08	2.02392e-07	1.14626e-07	1.12817e-07	6.96586e-08	1.52102e-07	1.88943e-10	1.66518e-07	5.71284e-08	7.9778e-08	1.43222e-10	2.24795e-07	1.26174e-07	1.74651e-10	1.99417e-07	1.39489e-07	1.67768e-07	1.1491e-07
fatty alcohol, from coconut oil, at plant	kg	chemicals	organics	0	0	0	0	0	0	0	0	0	0	0	0	0	0	0	0	0	0	0	0	0	0	0	0	0	0	0	0	0	0	0	0	0	0	0	0	0	0	0	0	0	0	0	0	0	0
fatty alcohol, from palm kernel oil, at plant	kg	chemicals	organics	0	0	0	0	0	0	0	0	0	0	0	0	0	0	0	0	0	0	0	0	0	0	0	0	0	0	0	0	0	0	0	0	0	0	0	0	0	0	0	0	0	0	0	0	0	0
fatty alcohol, from palm oil, at plant	kg	chemicals	organics	0	0	0	0	0	0	0	0	0	0	0	0	0	0	0	0	0	0	0	0	0	0	0	0	0	0	0	0	0	0	0	0	0	0	0	0	0	0	0	0	0	0	0	0	0	0
fatty alcohol, petrochemical, at plant	kg	chemicals	organics	1.69511e-07	3.06789e-08	2.98105e-08	2.30951e-08	7.45717e-08	3.06818e-08	3.08475e-08	2.30951e-08	2.9789e-08	3.06833e-08	2.30954e-08	6.78336e-08	2.99782e-08	2.9593e-08	5.86167e-08	8.57229e-08	7.94885e-08	7.41311e-11	2.98538e-08	4.53351e-11	4.21277e-08	3.19541e-08	2.99738e-08	4.21277e-08	9.38616e-08	7.84439e-08	5.14217e-08	6.63463e-08	5.52549e-08	3.79903e-08	1.17361e-07	6.41296e-08	6.63595e-08	1.35248e-07	2.40106e-11	1.16832e-07	5.29814e-08	9.36715e-08	2.12719e-11	6.11995e-08	3.08475e-08	2.21552e-11	7.21951e-08	6.44876e-08	4.71054e-08	2.97445e-08
formaldehyde, production mix, at plant	kg	chemicals	organics	0.00011461	5.26382e-05	2.26788e-05	3.66661e-05	6.4856e-05	5.26434e-05	2.65543e-05	3.66658e-05	3.00182e-05	5.26459e-05	3.66666e-05	6.30089e-05	2.07312e-05	1.55557e-05	3.90241e-05	6.69853e-05	6.05542e-05	1.72771e-07	2.76353e-05	9.32522e-08	2.83819e-05	3.23662e-05	0.000616252	2.83819e-05	6.87828e-05	8.92012e-05	3.01727e-05	4.13233e-05	3.23548e-05	4.48129e-05	7.05709e-05	0.0754961	4.10636e-05	8.39258e-05	5.29075e-08	7.40072e-05	3.25699e-05	5.50557e-05	4.18602e-08	0.732654	2.65542e-05	4.85742e-08	5.28499e-05	0.000396489	0.506356	2.82357e-05
formic acid from butane, at plant	kg	chemicals	organics	2.57159e-12	4.65625e-10	4.52429e-10	3.49795e-10	1.13047e-09	4.6567e-10	4.68133e-10	3.49795e-10	4.52135e-10	4.65693e-10	3.498e-10	1.02878e-09	4.54384e-10	4.49342e-10	8.89084e-10	1.3e-09	1.20549e-09	1.00697e-12	4.53097e-10	6.15096e-13	6.39301e-10	4.81603e-10	4.54802e-10	6.39301e-10	1.4236e-09	1.42466e-08	7.80904e-10	1.00626e-09	8.38658e-10	5.75362e-10	1.78095e-09	9.71641e-10	1.00662e-09	2.05188e-09	3.26147e-13	1.78303e-09	8.03758e-10	1.4209e-09	2.88846e-13	9.27477e-10	4.68133e-10	3.00862e-13	1.09545e-09	9.78968e-10	7.13756e-10	4.51251e-10
formic acid from methyl formate, at plant	kg	chemicals	organics	5.72385e-09	1.03639e-09	1.00702e-09	7.78577e-10	2.51621e-09	1.03649e-09	1.04197e-09	7.78576e-10	1.00636e-09	1.03654e-09	7.78586e-10	2.28986e-09	1.01137e-09	1.00015e-09	1.97893e-09	2.89354e-09	2.68318e-09	2.24132e-12	1.00851e-09	1.36908e-12	1.42296e-09	1.07196e-09	1.0123e-09	1.42296e-09	3.16866e-09	3.17102e-08	1.73814e-09	2.23975e-09	1.86669e-09	1.28064e-09	3.96404e-09	2.16269e-09	2.24055e-09	4.5671e-09	7.2594e-13	3.96868e-09	1.78901e-09	3.16265e-09	6.42915e-13	2.06438e-09	1.04197e-09	6.6966e-13	2.43827e-09	2.17899e-09	1.58868e-09	1.0044e-09
fraction 1, from naphtha, at plant	kg	chemicals	organics	0	0	0	0	0	0	0	0	0	0	0	0	0	0	0	0	0	0	0	0	0	0	0	0	0	0	0	0	0	0	0	0	0	0	0	0	0	0	0	0	0	0	0	0	0	0
fraction 7, from naphtha, at plant	kg	chemicals	organics	0	0	0	0	0	0	0	0	0	0	0	0	0	0	0	0	0	0	0	0	0	0	0	0	0	0	0	0	0	0	0	0	0	0	0	0	0	0	0	0	0	0	0	0	0	0
fraction 8, from naphtha, at plant	kg	chemicals	organics	0	0	0	0	0	0	0	0	0	0	0	0	0	0	0	0	0	0	0	0	0	0	0	0	0	0	0	0	0	0	0	0	0	0	0	0	0	0	0	0	0	0	0	0	0	0
glycerine, from epichlorohydrin, at plant	kg	chemicals	organics	0	0	0	0	0	0	0	0	0	0	0	0	0	0	0	0	0	0	0	0	0	0	0	0	0	0	0	0	0	0	0	0	0	0	0	0	0	0	0	0	0	0	0	0	0	0
heptane, at plant	kg	chemicals	organics	0	0	0	0	0	0	0	0	0	0	0	0	0	0	0	0	0	0	0	0	0	0	0	0	0	0	0	0	0	0	0	0	0	0	0	0	0	0	0	0	0	0	0	0	0	0
hexafluorethane, at plant	kg	chemicals	organics	8.52276e-08	1.54749e-08	1.50266e-08	1.15645e-08	3.75299e-08	1.54764e-08	1.55135e-08	1.15644e-08	1.50065e-08	1.54772e-08	1.15646e-08	3.41326e-08	1.50824e-08	1.49372e-08	2.95117e-08	4.31617e-08	4.00222e-08	3.26214e-11	1.50541e-08	2.00171e-11	2.12494e-08	1.58941e-08	1.51228e-08	2.12494e-08	4.72339e-08	3.95086e-08	2.59679e-08	3.34042e-08	2.78859e-08	1.90864e-08	5.92207e-08	3.22873e-08	3.34164e-08	6.81328e-08	1.05924e-11	5.88717e-08	2.66882e-08	4.72319e-08	9.42171e-12	3.07169e-08	1.55135e-08	9.77047e-12	3.63848e-08	3.24894e-08	2.36406e-08	1.50005e-08
hexamethyldisilazane, at plant	kg	chemicals	organics	2.80524e-07	5.10149e-08	4.95202e-08	4.15912e-08	1.24675e-07	5.10199e-08	5.18964e-08	4.15911e-08	5.06927e-08	5.10224e-08	4.15917e-08	1.1432e-07	4.98826e-08	4.79193e-08	9.71587e-08	1.41973e-07	1.31666e-07	2.04117e-10	4.91771e-08	1.08147e-10	6.95368e-08	5.49617e-08	4.87432e-08	6.95368e-08	1.56393e-07	1.43956e-07	8.31684e-08	1.09206e-07	9.00769e-08	6.68364e-08	1.91969e-07	1.05233e-07	1.08989e-07	2.22165e-07	6.11454e-11	1.91347e-07	8.69575e-08	1.53546e-07	4.66114e-11	1.03711e-07	5.18964e-08	5.65774e-11	1.19266e-07	1.06271e-07	8.0039e-08	4.9098e-08
hexane, at plant	kg	chemicals	organics	1.64981e-08	2.63792e-08	1.08242e-08	1.95737e-08	2.07262e-08	2.63819e-08	1.22423e-08	1.95735e-08	1.3079e-08	2.63831e-08	1.9574e-08	2.57455e-08	3.93438e-09	2.12015e-09	6.65222e-09	2.33398e-08	1.95017e-08	5.48571e-11	1.45483e-08	2.9593e-11	8.6236e-09	5.12695e-09	1.48864e-09	8.62361e-09	2.26683e-08	0.00186859	6.36174e-09	5.09178e-09	9.05387e-09	1.83661e-08	1.02772e-08	1.05593e-08	6.06166e-09	1.3448e-08	1.65926e-11	1.52815e-08	5.04796e-09	6.87681e-09	1.28963e-11	2.09683e-08	1.22423e-08	1.53434e-11	1.92706e-08	1.35477e-08	1.55e-08	1.11607e-08
hydrogen cyanide, at plant	kg	chemicals	organics	1.95938e-05	3.66696e-06	3.31336e-06	2.64676e-06	8.37673e-06	3.66732e-06	3.44346e-06	2.64676e-06	3.32561e-06	3.6675e-06	2.64679e-06	7.66287e-06	3.35413e-06	3.26501e-06	7.23025e-06	9.74222e-06	9.16447e-06	8.21983e-09	3.37126e-06	4.91028e-09	4.99052e-06	3.73666e-06	3.32371e-06	4.99052e-06	1.05982e-05	1.29041e-05	5.67387e-06	7.42055e-06	6.43843e-06	4.63796e-06	1.3171e-05	7.26841e-06	7.41829e-06	1.50847e-05	2.62852e-09	1.29802e-05	5.91239e-06	1.04066e-05	2.27702e-09	7.85024e-06	3.44346e-06	2.42617e-09	8.09684e-06	7.14662e-06	5.9709e-06	3.31357e-06
isobutanol, at plant	kg	chemicals	organics	0	0	0	0	0	0	0	0	0	0	0	0	0	0	0	0	0	0	0	0	0	0	0	0	0	0	0	0	0	0	0	0	0	0	0	0	0	0	0	0	0	0	0	0	0	0
isobutyl acetate, at plant	kg	chemicals	organics	0	0	0	0	0	0	0	0	0	0	0	0	0	0	0	0	0	0	0	0	0	0	0	0	0	0	0	0	0	0	0	0	0	0	0	0	0	0	0	0	0	0	0	0	0	0
isohexane, at plant	kg	chemicals	organics	0	0	0	0	0	0	0	0	0	0	0	0	0	0	0	0	0	0	0	0	0	0	0	0	0	0	0	0	0	0	0	0	0	0	0	0	0	0	0	0	0	0	0	0	0	0
isopropanol, at plant	kg	chemicals	organics	7.41951e-06	1.63643e-06	1.3461e-06	1.18242e-06	3.44171e-06	1.6366e-06	1.40493e-06	1.18242e-06	1.38481e-06	1.63667e-06	1.18243e-06	3.15144e-06	1.32585e-06	1.27936e-06	2.59871e-06	3.91972e-06	3.61589e-06	5.1052e-09	1.37105e-06	3.13802e-09	2.64561e-06	1.50545e-06	1.40406e-06	2.64561e-06	4.45773e-06	7.49598e-06	2.24432e-06	2.91586e-06	3.19458e-06	2.6455e-06	5.51812e-06	2.95197e-06	2.9202e-06	5.93758e-06	1.65815e-09	5.09863e-06	2.32719e-06	4.07247e-06	1.47661e-09	2.81141e-06	1.40493e-06	1.53008e-09	3.25104e-06	2.91303e-06	2.1588e-06	1.32976e-06
isopropyl acetate, at plant	kg	chemicals	organics	0	0	0	0	0	0	0	0	0	0	0	0	0	0	0	0	0	0	0	0	0	0	0	0	0	0	0	0	0	0	0	0	0	0	0	0	0	0	0	0	0	0	0	0	0	0
maleic anhydride from catalytic oxidation of benzene, at plant	kg	chemicals	organics	2.99906e-11	3.09194e-12	3.52725e-12	5.6413e-12	9.83299e-12	3.09224e-12	5.50975e-12	5.64124e-12	4.07802e-12	3.09239e-12	5.64137e-12	1.00347e-11	4.07168e-12	2.78965e-12	7.91149e-12	1.10504e-11	1.03285e-11	5.19651e-14	3.25257e-12	2.6894e-14	4.1188e-12	9.45463e-12	2.62632e-12	4.1188e-12	1.37781e-11	2.32061e-08	4.38722e-12	8.8572e-12	4.87631e-12	5.75981e-12	1.01577e-11	6.76741e-12	8.83601e-12	1.70405e-11	1.56309e-14	3.25141e-11	6.71139e-12	9.03154e-12	1.14655e-14	1.20149e-11	5.50974e-12	1.42498e-14	8.49584e-12	8.96804e-12	9.15375e-12	2.835e-12
maleic anhydride from the direct oxidation of n-butane, at plant	kg	chemicals	organics	8.99717e-11	9.27581e-12	1.05817e-11	1.69239e-11	2.9499e-11	9.27673e-12	1.65292e-11	1.69237e-11	1.22341e-11	9.27718e-12	1.69241e-11	3.0104e-11	1.2215e-11	8.36895e-12	2.37345e-11	3.31513e-11	3.09854e-11	1.55895e-13	9.7577e-12	8.06821e-14	1.23564e-11	2.83639e-11	7.87897e-12	1.23564e-11	4.13343e-11	6.96183e-08	1.31613e-11	2.65716e-11	1.46289e-11	1.72794e-11	3.04732e-11	2.03022e-11	2.6508e-11	5.11215e-11	4.62101e-14	9.75423e-11	2.01342e-11	2.70949e-11	3.43965e-14	3.60446e-11	1.65292e-11	4.27495e-14	2.54875e-11	2.69041e-11	2.74612e-11	8.505e-12
maleic anhydride, at plant	kg	chemicals	organics	1.19962e-10	1.23678e-11	1.4109e-11	2.25652e-11	3.9332e-11	1.2369e-11	2.2039e-11	2.2565e-11	1.63121e-11	1.23696e-11	2.25655e-11	4.01387e-11	1.62867e-11	1.11586e-11	3.1646e-11	4.42018e-11	4.13139e-11	2.07861e-13	1.30103e-11	1.07576e-13	1.64752e-11	3.78185e-11	1.05053e-11	1.64752e-11	5.51124e-11	9.28244e-08	1.75484e-11	3.54288e-11	1.95052e-11	2.30392e-11	4.06309e-11	2.70697e-11	3.53441e-11	6.8162e-11	6.16135e-14	1.30056e-10	2.68456e-11	3.61265e-11	4.5862e-14	4.80595e-11	2.20389e-11	5.69993e-14	3.39833e-11	3.58721e-11	3.6615e-11	1.134e-11
melamine, at plant	kg	chemicals	organics	9.15861e-09	9.25071e-07	9.17973e-07	2.00146e-06	4.06438e-06	9.25162e-07	1.14483e-06	2.00144e-06	9.08012e-07	9.25206e-07	2.0015e-06	3.41212e-06	1.84715e-06	5.40845e-07	3.14857e-06	4.20424e-06	3.96144e-06	8.97573e-09	8.30888e-07	5.0921e-09	1.42381e-06	6.43158e-06	9.73214e-07	1.42381e-06	4.60272e-06	2.6561e-06	4.09814e-07	3.37169e-06	1.19168e-06	4.67004e-06	4.21678e-06	2.16899e-06	3.01536e-06	5.83026e-06	2.78777e-09	4.35083e-06	2.26604e-06	4.13163e-06	2.28971e-09	4.79229e-06	1.14483e-06	2.57686e-09	2.67084e-06	2.045e-06	3.96444e-06	1.16177e-06
methanol, at plant	kg	chemicals	organics	0.000213483	0.000148935	5.37685e-05	9.74048e-05	0.000142632	0.00014895	6.57906e-05	9.74038e-05	7.46796e-05	0.000148957	9.7406e-05	0.245492	3.91887e-05	2.77725e-05	0.0029769	0.641496	0.494637	4.03535e-07	6.74233e-05	2.19152e-07	5.98914e-05	5.73954e-05	0.00204303	5.98914e-05	0.000145902	0.000310405	5.85288e-05	7.28581e-05	6.48649e-05	0.000104599	0.000130076	0.406752	7.41538e-05	0.000153909	1.24587e-07	0.000132709	5.93461e-05	9.68122e-05	9.98971e-08	0.826493	6.57904e-05	1.14035e-07	0.263817	0.00127752	0.571215	7.01608e-05
methanol, at regional storage	kg	chemicals	organics	2.53363e-05	1.73424e-05	1.10705e-05	1.44918e-05	1.80213e-05	1.73442e-05	1.48285e-05	1.44917e-05	1.11795e-05	1.7345e-05	1.4492e-05	2.24329e-05	5.51092e-06	3.76462e-06	1.01603e-05	2.23735e-05	1.95645e-05	4.09785e-08	9.5202e-06	2.26923e-08	1.00652e-05	7.10849e-06	0.000225397	1.00652e-05	2.47268e-05	1.51104e-05	7.82752e-06	9.19667e-06	1.05128e-05	1.66922e-05	1.66268e-05	0.321573	9.92217e-06	2.09966e-05	1.28036e-08	1.74957e-05	8.0647e-06	1.30584e-05	1.05024e-08	2.25425e-05	1.48284e-05	1.17057e-08	1.96801e-05	0.000145976	1.68382e-05	1.11128e-05
methyl acetate, at plant	kg	chemicals	organics	5.34817e-15	9.08859e-13	8.5882e-13	1.10547e-12	2.10046e-12	9.08949e-13	1.03087e-12	1.10546e-12	9.88359e-13	9.08997e-13	1.10548e-12	2.21398e-12	9.81666e-13	6.68048e-13	1.97055e-12	2.39047e-12	2.29389e-12	8.5698e-15	7.57236e-13	4.68454e-15	1.18267e-12	1.47846e-12	7.10002e-13	1.18267e-12	2.86391e-12	5.58121e-08	1.2879e-12	1.71033e-12	1.08363e-12	2.65198e-12	3.28226e-12	1.72416e-12	1.60259e-12	3.47934e-12	2.61531e-15	3.3067e-12	1.30791e-12	2.64345e-12	2.06336e-15	2.46978e-12	1.03087e-12	2.41428e-15	2.02609e-12	1.91783e-12	1.99689e-12	8.04485e-13
methyl acrylate, at plant	kg	chemicals	organics	1.93559e-09	3.51448e-07	3.41267e-07	2.62638e-07	8.52333e-07	3.51482e-07	3.52324e-07	2.62638e-07	3.40809e-07	3.51499e-07	2.62641e-07	7.75177e-07	3.42533e-07	3.39235e-07	6.70233e-07	9.80237e-07	9.08936e-07	7.40857e-10	3.41891e-07	4.54605e-10	4.82591e-07	3.60969e-07	3.43451e-07	4.82591e-07	1.07272e-06	8.9727e-07	5.8975e-07	7.58634e-07	6.3331e-07	4.33466e-07	1.34495e-06	7.3327e-07	7.58913e-07	1.54735e-06	2.40562e-10	1.33702e-06	6.0611e-07	1.07267e-06	2.13975e-10	6.97605e-07	3.52324e-07	2.21895e-10	8.26328e-07	7.37861e-07	5.36896e-07	3.40674e-07
methyl ethyl ketone from butane, at plant	kg	chemicals	organics	1.7825e-05	3.23466e-06	3.14115e-06	2.4208e-06	7.85119e-06	3.23498e-06	3.24346e-06	2.42079e-06	3.137e-06	3.23513e-06	2.42083e-06	7.13848e-06	3.15475e-06	3.12173e-06	6.17088e-06	9.02715e-06	8.3702e-06	6.8315e-09	3.14708e-06	4.19124e-09	4.44175e-06	3.33646e-06	3.16154e-06	4.44175e-06	9.8783e-06	8.25905e-06	5.42723e-06	6.98761e-06	5.82951e-06	3.99144e-06	1.2379e-05	6.75133e-06	6.98991e-06	1.42491e-05	2.21803e-09	1.23092e-05	5.58177e-06	9.87525e-06	1.97257e-09	6.42658e-06	3.24346e-06	2.04592e-09	7.607e-06	6.79116e-06	4.94632e-06	3.13616e-06
methyl ethyl ketone, at plant	kg	chemicals	organics	1.42063e-09	2.47337e-07	2.4045e-07	2.03721e-07	6.37877e-07	2.47361e-07	2.50231e-07	2.03721e-07	2.39903e-07	2.47373e-07	2.03724e-07	5.66142e-07	2.53321e-07	2.35795e-07	4.84288e-07	7.19804e-07	6.65635e-07	7.06377e-10	2.42222e-07	4.30167e-10	1.11625e-06	3.3789e-07	2.46236e-07	1.11625e-06	1.03533e-06	6.39721e-07	4.11048e-07	5.65215e-07	1.20417e-06	1.22059e-06	1.37143e-06	6.1312e-07	5.63448e-07	1.13287e-06	2.28627e-10	9.61989e-07	4.45427e-07	7.70439e-07	2.02247e-10	5.23266e-07	2.50231e-07	2.10859e-10	5.89641e-07	5.20229e-07	4.04364e-07	2.43927e-07
methyl formate, at plant	kg	chemicals	organics	0	0	0	0	0	0	0	0	0	0	0	0	0	0	0	0	0	0	0	0	0	0	0	0	0	0	0	0	0	0	0	0	0	0	0	0	0	0	0	0	0	0	0	0	0	0
methyl methacrylate, at plant	kg	plastics	monomers	0	0	0	0	0	0	0	0	0	0	0	0	0	0	0	0	0	0	0	0	0	0	0	0	0	0	0	0	0	0	0	0	0	0	0	0	0	0	0	0	0	0	0	0	0	0
methyl tert-butyl ether, at plant	kg	chemicals	organics	2.65573e-05	3.78833e-05	8.30847e-06	2.16543e-05	2.54006e-05	3.78872e-05	1.03976e-05	2.1654e-05	1.5041e-05	3.78889e-05	2.16546e-05	2.72303e-05	4.63113e-06	2.58634e-06	8.4423e-06	2.32231e-05	1.98235e-05	8.94301e-08	1.34695e-05	4.84482e-08	7.86662e-06	6.45005e-06	0.000602252	7.86663e-06	2.04972e-05	1.98612e-05	7.43778e-06	7.16899e-06	7.50718e-06	1.84075e-05	1.43896e-05	8.23621e-06	7.63947e-06	1.64994e-05	2.77246e-08	1.36517e-05	6.22773e-06	8.79209e-06	2.23341e-08	1.81905e-05	1.03976e-05	2.52941e-08	1.7658e-05	0.000365808	1.36209e-05	1.37137e-05
methyl-3-methoxypropionate, at plant	kg	chemicals	organics	2.52273e-09	4.58057e-07	4.44787e-07	3.42307e-07	1.11088e-06	4.58102e-07	4.59199e-07	3.42307e-07	4.44191e-07	4.58124e-07	3.42311e-07	1.01032e-06	4.46438e-07	4.4214e-07	8.73543e-07	1.27758e-06	1.18465e-06	9.6559e-10	4.45601e-07	5.92505e-10	6.28981e-07	4.70466e-07	4.47634e-07	6.28981e-07	1.39812e-06	1.16945e-06	7.68647e-07	9.88761e-07	8.25419e-07	5.64955e-07	1.75293e-06	9.55702e-07	9.89124e-07	2.01673e-06	3.13535e-10	1.7426e-06	7.89969e-07	1.39806e-06	2.78882e-10	9.09218e-07	4.59199e-07	2.89205e-10	1.07699e-06	9.61685e-07	6.99759e-07	4.44014e-07
methylamine, at plant	kg	chemicals	organics	2.78833e-15	4.7328e-13	4.48381e-13	5.77175e-13	1.09597e-12	4.73327e-13	5.39932e-13	5.78176e-13	5.15996e-13	4.73352e-13	5.79371e-13	1.15858e-12	5.1176e-13	3.48329e-13	1.02738e-12	1.24638e-12	1.19617e-12	4.47872e-15	3.94291e-13	2.4367e-15	6.16278e-13	7.70888e-13	3.70204e-13	6.16241e-13	1.49328e-12	2.91012e-08	6.71648e-13	8.92355e-13	5.64668e-13	1.38278e-12	1.71135e-12	8.98999e-13	8.35729e-13	1.81416e-12	1.3646e-15	1.72335e-12	6.82377e-13	1.37827e-12	1.0748e-15	1.29024e-12	5.39542e-13	1.25882e-15	1.05465e-12	1.00076e-12	1.04251e-12	4.18958e-13
methylchloride, at plant	kg	chemicals	organics	5.25804e-08	8.70345e-09	8.53932e-09	8.57386e-09	2.42136e-08	8.7043e-09	9.18837e-09	8.57383e-09	8.71521e-09	8.70472e-09	8.57399e-09	2.12244e-08	9.49107e-09	7.9902e-09	1.75949e-08	2.66546e-08	2.45709e-08	3.69548e-11	8.58836e-09	2.01913e-11	1.19252e-08	1.57982e-08	8.58223e-09	1.19252e-08	2.90483e-08	2.44962e-08	1.39584e-08	2.14122e-08	1.5744e-08	1.21065e-08	3.30355e-08	1.92407e-08	2.12274e-08	4.1951e-08	1.12535e-11	3.47643e-08	1.65509e-08	2.74641e-08	8.87971e-12	2.034e-08	9.18837e-09	1.0406e-11	2.11337e-08	1.818e-08	1.5792e-08	8.69882e-09
methylchloride, at regional storage	kg	chemicals	organics	5.25804e-08	8.70345e-09	8.53932e-09	8.57386e-09	2.42136e-08	8.7043e-09	9.18837e-09	8.57383e-09	8.71521e-09	8.70472e-09	8.57399e-09	2.12244e-08	9.49107e-09	7.9902e-09	1.75949e-08	2.66546e-08	2.45709e-08	3.69548e-11	8.58836e-09	2.01913e-11	1.19252e-08	1.57982e-08	8.58223e-09	1.19252e-08	2.90483e-08	2.44962e-08	1.39584e-08	2.14122e-08	1.5744e-08	1.21065e-08	3.30355e-08	1.92407e-08	2.12274e-08	4.1951e-08	1.12535e-11	3.47643e-08	1.65509e-08	2.74641e-08	8.87971e-12	2.034e-08	9.18837e-09	1.0406e-11	2.11337e-08	1.818e-08	1.5792e-08	8.69882e-09
methylcyclohexane, at plant	kg	chemicals	organics	0	0	0	0	0	0	0	0	0	0	0	0	0	0	0	0	0	0	0	0	0	0	0	0	0	0	0	0	0	0	0	0	0	0	0	0	0	0	0	0	0	0	0	0	0	0
methylcyclohexane, from naphtha, at plant	kg	chemicals	organics	0	0	0	0	0	0	0	0	0	0	0	0	0	0	0	0	0	0	0	0	0	0	0	0	0	0	0	0	0	0	0	0	0	0	0	0	0	0	0	0	0	0	0	0	0	0
methylcyclopentane, from naphtha, at plant	kg	chemicals	organics	0	0	0	0	0	0	0	0	0	0	0	0	0	0	0	0	0	0	0	0	0	0	0	0	0	0	0	0	0	0	0	0	0	0	0	0	0	0	0	0	0	0	0	0	0	0
methylene diphenyl diisocyanate, at plant	kg	plastics	monomers	1.02215e-07	1.79614e-08	1.23895e-07	1.57205e-07	1.59504e-07	1.79632e-08	1.34962e-06	1.57203e-07	1.34022e-07	1.7964e-08	1.57206e-07	1.65472e-07	4.25131e-08	1.57627e-08	2.26435e-07	1.84971e-07	1.94508e-07	3.31643e-10	3.50797e-07	1.37066e-10	4.67898e-07	2.86825e-08	1.52394e-08	4.679e-07	5.99497e-08	2.12413e-07	2.57257e-08	3.92329e-08	2.75608e-08	2.2847e-08	5.83488e-08	6.4851e-07	3.94579e-08	7.86708e-08	8.772e-11	2.42058e-07	3.09041e-08	4.82972e-08	4.78013e-11	2.3901e-07	1.34962e-06	8.1611e-11	1.36047e-07	1.01985e-07	1.68306e-07	1.67117e-08
monochlorobenzene, at plant	kg	chemicals	organics	1.89235e-10	2.08867e-11	2.30378e-11	3.61215e-11	6.32526e-11	2.08888e-11	3.5039e-11	3.61212e-11	2.66306e-11	2.08898e-11	3.6122e-11	6.48173e-11	2.6439e-11	1.80929e-11	5.1536e-11	7.11694e-11	6.66537e-11	3.26311e-13	2.12136e-11	1.69602e-13	2.73499e-11	5.90693e-11	1.72552e-11	2.73499e-11	8.83114e-11	3.20047e-07	2.91692e-11	5.62603e-11	3.14682e-11	4.1161e-11	6.83196e-11	4.42648e-11	5.58475e-11	1.08828e-10	9.69414e-14	1.98079e-10	4.26817e-11	5.99351e-11	7.24961e-14	7.69498e-11	3.5039e-11	8.96669e-14	5.52684e-11	5.7615e-11	5.89442e-11	1.88758e-11
monochloropentafluoroethane, at plant	kg	chemicals	organics	0	0	0	0	0	0	0	0	0	0	0	0	0	0	0	0	0	0	0	0	0	0	0	0	0	0	0	0	0	0	0	0	0	0	0	0	0	0	0	0	0	0	0	0	0	0
monoethanolamine, at plant	kg	chemicals	organics	2.58363e-09	4.68488e-07	4.54983e-07	3.51398e-07	1.13823e-06	4.68533e-07	4.69963e-07	3.51398e-07	4.5446e-07	4.68556e-07	3.51402e-07	1.03482e-06	4.57286e-07	4.5197e-07	8.94124e-07	1.30873e-06	1.21337e-06	9.97099e-10	4.55852e-07	6.10639e-10	6.433e-07	4.85726e-07	4.57914e-07	6.433e-07	1.43165e-06	1.33143e-06	7.85815e-07	1.01287e-06	0.00626684	5.78658e-07	1.79277e-06	9.78605e-07	1.01314e-06	2.0649e-06	3.23406e-10	1.78324e-06	8.08915e-07	1.43057e-06	2.87116e-10	9.32523e-07	4.69963e-07	2.98323e-10	1.10218e-06	9.83558e-07	7.17736e-07	4.5431e-07
N,N-dimethylformamide, at plant	kg	chemicals	organics	0	0	0	0	0	0	0	0	0	0	0	0	0	0	0	0	0	0	0	0	0	0	0	0	0	0	0	0	0	0	0	0	0	0	0	0	0	0	0	0	0	0	0	0	0	0
nitrobenzene, at plant	kg	chemicals	organics	1.42158e-09	2.47774e-07	2.40687e-07	2.04123e-07	6.38402e-07	2.47798e-07	2.50531e-07	2.04123e-07	2.40184e-07	2.4781e-07	2.04126e-07	5.66741e-07	2.53479e-07	2.35895e-07	4.84582e-07	7.20395e-07	6.66158e-07	7.08364e-10	2.42501e-07	4.31217e-10	1.11647e-06	3.38184e-07	2.46325e-07	1.11647e-06	1.03598e-06	2.75163e-05	4.11252e-07	5.65501e-07	1.20441e-06	1.22102e-06	1.33	6.13438e-07	5.63745e-07	1.13348e-06	2.29222e-10	9.62926e-07	4.4566e-07	7.70775e-07	2.027e-10	5.23847e-07	2.50531e-07	2.11409e-10	5.90117e-07	5.20636e-07	4.04804e-07	2.44152e-07
N-methyl-2-pyrrolidone, at plant	kg	chemicals	organics	1.11651e-08	2.02459e-09	1.96622e-09	1.51808e-09	4.91941e-09	2.02479e-09	2.03071e-09	1.51808e-09	1.96368e-09	2.02489e-09	1.5181e-09	4.47121e-09	1.97634e-09	1.95347e-09	3.86417e-09	5.65444e-09	5.24268e-09	4.28637e-12	1.97008e-09	2.62919e-12	2.78017e-09	2.09994e-09	1.97921e-09	2.78017e-09	6.18716e-09	5.16999e-09	3.39634e-09	4.37791e-09	3.64925e-09	2.49982e-09	7.74834e-09	4.22771e-09	4.37914e-09	8.92486e-09	1.39151e-12	7.70725e-09	3.49633e-09	6.18307e-09	1.23725e-12	4.02733e-09	2.03071e-09	1.28354e-12	4.76261e-09	4.25065e-09	3.09989e-09	1.96349e-09
n-olefins, at plant	kg	chemicals	organics	1.3188e-07	2.38682e-08	2.31926e-08	1.7968e-08	5.80168e-08	2.38705e-08	2.39993e-08	1.7968e-08	2.31758e-08	2.38716e-08	1.79682e-08	5.27745e-08	2.33231e-08	2.30234e-08	4.56038e-08	6.66924e-08	6.18421e-08	5.7674e-11	2.32263e-08	3.52707e-11	3.27754e-08	2.48603e-08	2.33196e-08	3.27754e-08	7.30243e-08	6.10293e-08	4.00061e-08	5.16174e-08	4.29883e-08	2.95565e-08	9.13068e-08	4.98928e-08	5.16277e-08	1.05223e-07	1.86802e-11	9.08952e-08	4.12195e-08	7.28764e-08	1.65495e-11	4.76132e-08	2.39993e-08	1.72368e-11	5.61678e-08	5.01714e-08	3.6648e-08	2.31412e-08
o-dichlorobenzene, at plant	kg	chemicals	organics	8.53165e-10	1.22195e-10	1.22415e-10	1.71567e-10	3.1235e-10	1.22207e-10	1.61455e-10	1.71566e-10	1.41758e-10	1.22214e-10	1.71569e-10	3.27198e-10	1.41334e-10	9.49711e-11	2.81179e-10	3.53842e-10	3.37129e-10	1.43988e-12	1.08713e-10	7.70185e-13	1.6072e-10	2.50688e-10	9.75587e-11	1.6072e-10	4.31301e-10	5.99455e-06	1.73219e-10	2.63074e-10	1.56478e-10	3.31845e-10	4.32834e-10	2.42182e-10	2.51569e-10	5.24488e-10	4.34338e-13	6.75549e-10	2.00114e-10	3.57935e-10	3.3497e-13	3.76393e-10	1.61455e-10	4.0128e-13	2.90635e-10	2.85846e-10	2.98724e-10	1.09304e-10
paraffin, at plant	kg	chemicals	organics	2.12452e-09	3.25988e-07	3.14728e-07	3.38149e-07	8.12435e-07	3.2602e-07	3.48465e-07	3.38147e-07	3.49605e-07	3.26037e-07	3.38153e-07	7.65054e-07	3.25319e-07	2.78258e-07	6.2478e-07	8.92895e-07	8.31228e-07	6.58693e-09	2.99148e-07	3.66824e-09	4.4291e-07	4.16926e-07	2.87808e-07	4.4291e-07	1.00912e-06	3.95423e-06	0.716001	8.96122e-07	5.38009e-07	5.41356e-07	1.16845e-06	7.47362e-07	8.67467e-07	1.68134e-06	2.03569e-09	6.56426e-06	6.58378e-07	9.35162e-07	1.65169e-09	7.32198e-07	3.48465e-07	1.87841e-09	7.43917e-07	6.64075e-07	5.69472e-07	2.98117e-07
p-dichlorobenzene, at plant	kg	chemicals	organics	3.00731e-09	5.4532e-07	5.29597e-07	4.08908e-07	1.32503e-06	5.45373e-07	5.46972e-07	4.08907e-07	5.28917e-07	5.454e-07	4.08913e-07	1.20432e-06	5.32326e-07	5.26157e-07	1.04082e-06	1.52301e-06	1.4121e-06	1.15476e-09	5.30633e-07	7.08289e-10	7.48833e-07	5.65633e-07	5.33091e-07	7.48833e-07	1.6665e-06	3.29269e-06	9.14789e-07	1.17917e-06	9.82901e-07	6.73375e-07	2.08699e-06	1.13872e-06	1.1795e-06	2.40388e-06	3.7487e-10	2.07593e-06	9.41721e-07	1.66539e-06	3.33304e-10	1.08478e-06	5.46972e-07	3.45784e-10	1.2828e-06	1.14491e-06	8.3497e-07	5.2886e-07
penta-erythritol, at plant	kg	chemicals	organics	4.68239e-09	7.88008e-07	7.04584e-07	1.07751e-06	1.51163e-06	7.88085e-07	8.52098e-07	1.0775e-06	8.97447e-07	7.88133e-07	1.07752e-06	1.88764e-06	8.74373e-07	4.33024e-07	1.88251e-06	1.76369e-06	1.79102e-06	1.21723e-08	5.25413e-07	6.62098e-09	1.03335e-06	1.19287e-06	5.01364e-07	1.03335e-06	2.28477e-06	8.2472e-06	1.08773e-06	1.13503e-06	5.13676e-07	3.70328e-06	2.93823e-06	1.37477e-06	9.36928e-07	2.39263e-06	3.7088e-09	2.34507e-06	8.28573e-07	2.2772e-06	2.91053e-09	2.40904e-06	8.52097e-07	3.42124e-09	1.60927e-06	1.55972e-06	2.03152e-06	6.47258e-07
pentane, at plant	kg	chemicals	organics	6.45219e-08	1.08737e-08	1.96965e-08	2.54251e-08	3.55859e-08	1.08748e-08	1.29014e-07	2.54248e-08	0.83732	1.08753e-08	2.54253e-08	3.74685e-08	1.39458e-08	8.15868e-09	4.0399e-08	4.07854e-08	4.06965e-08	1.21967e-10	3.84492e-08	6.27159e-11	5.31938e-08	1.81637e-08	8.57165e-09	5.3194e-08	3.48877e-08	0.000606899	1.54207e-08	2.09732e-08	1.3241e-08	3.04201e-08	3.89655e-08	7.45589e-08	1.97997e-08	4.25472e-08	3.60163e-11	5.52797e-08	1.60683e-08	3.15186e-08	2.65001e-11	4.68856e-08	1.29014e-07	3.33035e-11	3.27633e-08	2.87589e-08	3.57759e-08	9.70226e-09
phenol, at plant	kg	chemicals	organics	6.27041e-05	4.41462e-05	1.4381e-05	2.66721e-05	4.06356e-05	4.41506e-05	1.67534e-05	2.66718e-05	2.12132e-05	4.41527e-05	2.66724e-05	4.12081e-05	1.07892e-05	8.47922e-06	2.04567e-05	4.06339e-05	3.59931e-05	1.32696e-07	1.94984e-05	7.25129e-08	1.68328e-05	1.3099e-05	0.000608259	1.68328e-05	0.358811	6.58808e-05	1.78418e-05	2.15409e-05	1.89278e-05	2.73333e-05	3.83344e-05	2.16825e-05	2.18675e-05	4.51612e-05	4.10659e-08	6.08609e-05	1.74486e-05	0.916028	3.31189e-08	3.09829e-05	1.67533e-05	3.76128e-08	3.23014e-05	0.000378859	2.35107e-05	1.97613e-05
phosgene, liquid, at plant	kg	chemicals	organics	2.46248e-12	7.01547e-10	4.74971e-10	7.32485e-10	1.11358e-09	7.01618e-10	5.99454e-10	7.32478e-10	5.57883e-10	7.01652e-10	7.32494e-10	1.2246e-09	4.22378e-10	2.76557e-10	8.22317e-10	1.25916e-09	1.15869e-09	4.55245e-12	4.94891e-10	2.4356e-12	5.39659e-10	7.2955e-10	2.73077e-10	5.3966e-10	1.45068e-09	4.23565e-05	5.38478e-10	7.58308e-10	5.38599e-10	1.11128e-09	1.25971e-09	7.79443e-10	7.44085e-10	1.55812e-09	1.37295e-12	2.01393e-09	5.94067e-10	1.02009e-09	1.05887e-12	1.28287e-09	5.99453e-10	1.26872e-12	1.03364e-09	9.39208e-10	9.99942e-10	4.45025e-10
phthalic anhydride, at plant	kg	chemicals	organics	1.89041e-05	3.36143e-06	3.1934e-06	3.08795e-06	7.6904e-06	3.36176e-06	3.44397e-06	3.08793e-06	3.41811e-06	3.36193e-06	3.08798e-06	7.59191e-06	3.39878e-06	2.86165e-06	6.84811e-06	8.8698e-06	8.40481e-06	1.92443e-08	2.98951e-06	1.08498e-08	4.55563e-06	3.90695e-06	2.97011e-06	4.55563e-06	1.01202e-05	1.58986e-05	5.34098e-06	6.59102e-06	4.99905e-06	7.31379e-06	1.27606e-05	6.70215e-06	6.36226e-06	1.35334e-05	5.97285e-09	1.20161e-05	5.17508e-06	1.01034e-05	4.87312e-09	7.65638e-06	3.44397e-06	5.50984e-09	7.61841e-06	6.946e-06	6.09825e-06	3.12051e-06
polyols, at plant	kg	plastics	monomers	1.90674e-07	3.42013e-08	9.9923e-08	1.15747e-07	1.55758e-07	3.42046e-08	8.68731e-07	1.15745e-07	1.06241e-07	3.42063e-08	1.15748e-07	1.544e-07	4.90574e-08	3.20123e-08	1.85703e-07	1.80038e-07	1.81341e-07	2.56526e-10	2.4215e-07	1.15756e-10	3.24706e-07	4.18915e-08	3.19846e-08	3.24707e-07	1.07738e-07	1.91709e-07	5.46063e-08	7.42456e-08	5.8634e-08	4.26644e-08	1.24381e-07	4.54315e-07	7.43988e-08	1.50513e-07	7.07773e-11	2.3906e-07	5.90188e-08	1.00361e-07	4.40058e-11	1.95469e-07	8.68728e-07	6.57227e-11	1.39244e-07	1.12082e-07	1.40641e-07	3.27306e-08
polyvinylfluoride film, at plant	kg	chemicals	organics	4.94676e-08	3.23357e-09	3.73634e-09	1.33744e-08	2.79505e-08	3.2339e-09	5.53808e-09	1.33742e-08	3.93168e-09	3.23405e-09	1.33746e-08	1.92293e-08	9.809e-09	1.47345e-09	1.29303e-08	2.5275e-08	2.24357e-08	4.65544e-11	4.31154e-09	2.63985e-11	4.66247e-09	4.7355e-08	4.63531e-09	4.66247e-09	2.60342e-08	1.05535e-08	3.16459e-09	2.33739e-08	7.83191e-09	9.88518e-09	1.33607e-08	1.43594e-08	2.25536e-08	3.79017e-08	1.44537e-11	2.31004e-08	1.56772e-08	1.78059e-08	1.18631e-11	2.4945e-08	5.53807e-09	1.33611e-11	1.26815e-08	6.87809e-09	1.99417e-08	5.21015e-09
polyvinylfluoride, at plant	kg	chemicals	organics	4.18744e-08	2.73722e-09	3.16282e-09	1.13214e-08	2.36602e-08	2.7375e-09	4.68799e-09	1.13213e-08	3.32817e-09	2.73762e-09	1.13217e-08	1.62777e-08	8.30333e-09	1.24728e-09	1.09455e-08	2.13953e-08	1.89919e-08	3.94084e-11	3.64972e-09	2.23464e-11	3.94678e-09	4.00861e-08	3.92379e-09	3.94679e-09	2.2038e-08	8.93359e-09	2.67883e-09	1.9786e-08	6.62972e-09	8.36782e-09	1.13098e-08	1.21552e-08	1.90916e-08	3.20838e-08	1.2235e-11	1.95545e-08	1.32707e-08	1.50727e-08	1.00422e-11	2.1116e-08	4.68798e-09	1.13102e-11	1.07349e-08	5.82231e-09	1.68806e-08	4.4104e-09
polyvinylfluoride, dispersion, at plant	kg	chemicals	organics	3.97819e-08	2.60044e-09	3.00477e-09	1.07557e-08	2.24778e-08	2.6007e-09	4.45372e-09	1.07555e-08	3.16186e-09	2.60082e-09	1.07559e-08	1.54642e-08	7.8884e-09	1.18495e-09	1.03985e-08	2.03262e-08	1.80428e-08	3.74391e-11	3.46734e-09	2.12297e-11	3.74956e-09	3.80829e-08	3.72772e-09	3.74956e-09	2.09367e-08	8.48716e-09	2.54497e-09	1.87973e-08	6.29842e-09	7.94967e-09	1.07446e-08	1.15478e-08	1.81376e-08	3.04805e-08	1.16236e-11	1.85774e-08	1.26076e-08	1.43195e-08	9.54034e-12	2.00608e-08	4.45372e-09	1.0745e-11	1.01985e-08	5.53136e-09	1.60371e-08	4.19001e-09
propanal, at plant	kg	chemicals	organics	3.7285e-12	3.332e-10	3.28255e-10	1.01656e-09	0.99556	3.33233e-10	4.7601e-10	1.01655e-09	3.55423e-10	3.33249e-10	1.01659e-09	1.48534e-09	7.18764e-10	1.43915e-10	9.8983e-10	1.89203e-09	1.68452e-09	3.93737e-12	3.7179e-10	2.19694e-12	3.9472e-10	3.27111e-09	3.49906e-10	3.9472e-10	1.97793e-09	6.17866e-06	2.93991e-10	1.68233e-09	6.12126e-10	8.06826e-10	1.07178e-09	1.07809e-09	1.62891e-09	2.78219e-09	1.21233e-12	1.98141e-09	1.1437e-09	1.33455e-09	9.78563e-13	1.87629e-09	4.76009e-10	1.12077e-12	1.01482e-09	6.19674e-10	1.49181e-09	4.17977e-10
propylene glycol, liquid, at plant	kg	chemicals	organics	1.74169e-05	2.39655e-05	2.69868e-06	3.03537e-06	6.6169e-06	2.39679e-05	2.8808e-06	3.03534e-06	2.96013e-06	2.39691e-05	3.03541e-06	6.87874e-06	3.14061e-06	2.17854e-06	6.6147e-06	7.72896e-06	7.47268e-06	2.8868e-08	2.65354e-06	1.4092e-08	4.22706e-06	2.903e-06	2.39476e-06	4.22706e-06	8.6265e-06	1.72804e-05	7.37401e-06	5.78115e-06	3.72235e-06	1.06002e-05	1.20341e-05	4.66332e-06	5.42358e-06	1.18955e-05	8.38632e-09	1.0759e-05	4.41101e-06	9.02101e-06	5.8358e-09	7.36119e-06	2.8808e-06	7.7076e-09	6.61121e-06	5.86946e-06	6.11783e-06	3.28089e-06
propylene oxide, liquid, at plant	kg	chemicals	organics	2.27979e-05	2.08333e-05	3.71112e-06	3.64594e-06	9.20565e-06	2.08354e-05	3.91063e-06	3.64592e-06	3.91938e-06	2.08364e-05	3.64599e-06	9.05165e-06	4.08338e-06	3.27994e-06	8.35488e-06	1.06695e-05	1.01371e-05	2.66072e-08	3.67879e-06	1.34141e-08	5.57664e-06	4.04792e-06	3.47864e-06	5.57664e-06	1.18082e-05	1.81095e-05	8.58334e-06	8.10376e-06	5.85622e-06	1.04831e-05	1.57461e-05	7.07455e-06	7.81631e-06	1.65935e-05	7.84544e-09	1.47052e-05	6.30183e-06	1.21089e-05	5.67265e-09	9.10072e-06	3.91063e-06	7.21426e-09	9.05456e-06	8.04936e-06	7.36892e-06	4.1788e-06
propylene, at plant	kg	plastics	monomers	0.0814668	7.69984e-05	0.666679	3.85457e-05	5.54972e-05	7.70062e-05	2.2841e-05	3.85453e-05	2.9689e-05	7.70098e-05	3.85462e-05	5.71917e-05	1.42327e-05	1.04298e-05	2.71951e-05	5.48687e-05	4.85038e-05	1.75777e-07	2.71208e-05	9.55116e-08	0.914973	1.72456e-05	0.853907	0.914973	0.177451	0.000145231	2.47954e-05	0.583967	2.48723e-05	4.29502e-05	5.06703e-05	2.70473e-05	2.69939e-05	5.67316e-05	5.43679e-08	5.9378e-05	2.17205e-05	0.452961	4.36732e-08	4.28031e-05	2.2841e-05	4.97148e-08	0.429726	0.883828	3.26702e-05	2.78526e-05
propylene, pipeline system, at plant	kg	plastics	monomers	0	0	0	0	0	0	0	0	0	0	0	0	0	0	0	0	0	0	0	0	0	0	0	0	0	0	0	0	0	0	0	0	0	0	0	0	0	0	0	0	0	0	0	0	0	0
refrigerant R134a, at plant	kg	chemicals	organics	0	0	0	0	0	0	0	0	0	0	0	0	0	0	0	0	0	0	0	0	0	0	0	0	0	0	0	0	0	0	0	0	0	0	0	0	0	0	0	0	0	0	0	0	0	0
sodium formate, reaction of formaldehyde with acetaldehyde, at plant	kg	chemicals	organics	0	0	0	0	0	0	0	0	0	0	0	0	0	0	0	0	0	0	0	0	0	0	0	0	0	0	0	0	0	0	0	0	0	0	0	0	0	0	0	0	0	0	0	0	0	0
sodium methoxide, at plant	kg	chemicals	organics	4.69702e-11	4.84249e-12	5.52426e-12	8.83521e-12	1.54001e-11	4.84297e-12	8.62918e-12	8.83513e-12	6.38686e-12	4.84321e-12	8.83533e-12	1.5716e-11	6.37694e-12	4.36906e-12	1.23907e-11	1.73068e-11	1.61761e-11	8.1386e-14	5.09406e-12	4.21205e-14	6.45074e-12	1.48075e-11	4.11327e-12	6.45074e-12	2.15788e-11	3.63454e-08	6.87095e-12	1.38719e-11	7.63711e-12	9.02084e-12	1.59087e-11	1.05989e-11	1.38387e-11	2.66883e-11	2.41242e-14	5.09225e-11	1.05112e-11	1.41451e-11	1.79569e-14	1.88173e-11	8.62916e-12	2.23176e-14	1.33059e-11	1.40454e-11	1.43363e-11	4.44009e-12
solvents, organic, unspecified, at plant	kg	chemicals	organics	2.12988e-05	3.7082e-06	3.60495e-06	3.05429e-06	9.56338e-06	3.70856e-06	3.75159e-06	3.05428e-06	3.59675e-06	3.70874e-06	3.05433e-06	8.48789e-06	3.79792e-06	3.53516e-06	7.26069e-06	1.07917e-05	9.97954e-06	1.05904e-08	3.63152e-06	6.44927e-09	1.67353e-05	5.06582e-06	3.69169e-06	1.67353e-05	1.55222e-05	9.59103e-06	6.16264e-06	8.47398e-06	1.80535e-05	1.82997e-05	2.05612e-05	9.1922e-06	8.4475e-06	1.69846e-05	3.42769e-09	1.44226e-05	6.67806e-06	1.15508e-05	3.03218e-09	7.84506e-06	3.75159e-06	3.1613e-09	8.84019e-06	7.79953e-06	6.06243e-06	3.65707e-06
styrene, at plant	kg	plastics	monomers	2.56542e-05	3.77161e-05	8.14214e-06	2.14293e-05	2.49825e-05	3.772e-05	1.01826e-05	2.1429e-05	1.48445e-05	3.77217e-05	2.14296e-05	2.68027e-05	4.45942e-06	2.45582e-06	8.11656e-06	2.27617e-05	1.93933e-05	8.50867e-08	1.33209e-05	4.65364e-08	8.4415e-06	6.1885e-06	0.000602125	8.4415e-06	2.0197e-05	1.83581e-05	7.18579e-06	6.83062e-06	8.03403e-06	1.90061e-05	1.42794e-05	8.01555e-06	7.30383e-06	1.5814e-05	2.65399e-08	1.2971e-05	5.96218e-06	8.35241e-06	2.16233e-08	1.77563e-05	1.01826e-05	2.41941e-08	1.72748e-05	0.000365441	1.32834e-05	1.35724e-05
tetrachloroethylene, at plant	kg	chemicals	organics	1.42063e-09	2.47337e-07	2.4045e-07	2.03721e-07	6.37877e-07	2.47361e-07	2.50231e-07	2.03721e-07	2.39903e-07	2.47373e-07	2.03724e-07	5.66142e-07	2.53321e-07	2.35795e-07	4.84288e-07	7.19804e-07	6.65635e-07	7.06377e-10	2.42222e-07	4.30167e-10	1.11625e-06	3.3789e-07	2.46236e-07	1.11625e-06	1.03533e-06	6.39721e-07	4.11048e-07	5.65215e-07	1.20417e-06	1.22059e-06	1.37143e-06	6.1312e-07	5.63448e-07	1.13287e-06	2.28627e-10	9.61989e-07	4.45427e-07	7.70439e-07	2.02247e-10	5.23266e-07	2.50231e-07	2.10859e-10	5.89641e-07	5.20229e-07	4.04364e-07	2.43927e-07
tetrahydrofuran, at plant	kg	chemicals	organics	0	0	0	0	0	0	0	0	0	0	0	0	0	0	0	0	0	0	0	0	0	0	0	0	0	0	0	0	0	0	0	0	0	0	0	0	0	0	0	0	0	0	0	0	0	0
toluene diisocyanate, at plant	kg	plastics	monomers	9.40542e-10	1.52339e-10	1.50331e-10	1.50843e-10	4.34875e-10	1.52354e-10	1.62025e-10	1.50843e-10	1.51163e-10	1.52362e-10	1.50846e-10	3.76729e-10	1.70331e-10	1.41383e-10	3.12509e-10	4.78193e-10	4.40086e-10	4.59735e-13	1.52387e-10	2.73071e-13	2.09734e-10	2.99892e-10	1.53403e-10	2.09734e-10	5.19611e-10	3.98067e-10	2.47761e-10	3.81885e-10	2.805e-10	2.06976e-10	5.85149e-10	3.4537e-10	3.7953e-10	7.47786e-10	1.46528e-13	6.14599e-10	2.95575e-10	4.90018e-10	1.26201e-13	3.64516e-10	1.62024e-10	1.35273e-13	3.75399e-10	3.19951e-10	2.82809e-10	1.54168e-10
toluene, liquid, at plant	kg	chemicals	organics	2.56628e-05	3.77177e-05	8.14351e-06	2.14312e-05	2.49858e-05	3.77215e-05	1.01843e-05	2.14309e-05	1.48461e-05	3.77232e-05	2.14314e-05	2.68063e-05	4.46096e-06	2.45684e-06	8.11963e-06	2.27655e-05	1.9397e-05	8.51013e-08	1.33222e-05	4.65443e-08	8.44333e-06	6.19096e-06	0.000602126	8.44333e-06	2.02016e-05	0.000112172	7.18775e-06	6.83331e-06	8.03571e-06	1.90102e-05	1.42843e-05	8.01823e-06	0.605267	0.961713	2.65444e-08	0.907718	0.768596	8.35643e-06	2.16268e-08	1.77603e-05	1.01843e-05	2.41982e-08	1.7278e-05	0.000365444	1.32866e-05	1.35737e-05
trichloroethylene, at plant	kg	chemicals	organics	0	0	0	0	0	0	0	0	0	0	0	0	0	0	0	0	0	0	0	0	0	0	0	0	0	0	0	0	0	0	0	0	0	0	0	0	0	0	0	0	0	0	0	0	0	0
trichloromethane, at plant	kg	chemicals	organics	3.52173e-07	5.4207e-08	2.36013e-07	2.91776e-07	3.5135e-07	5.42123e-08	2.31923e-06	2.91772e-07	2.52021e-07	5.42149e-08	2.91778e-07	3.46147e-07	1.03339e-07	4.91578e-08	4.38771e-07	4.00824e-07	4.09552e-07	1.95455e-10	6.21917e-07	1.10606e-10	8.32578e-07	1.1168e-07	5.41855e-08	8.32581e-07	1.92915e-07	7.6043e-07	8.62502e-08	1.36564e-07	9.8261e-08	7.39137e-08	2.04889e-07	0.235001	1.3628e-07	2.68599e-07	6.06455e-11	5.14464e-07	1.06112e-07	1.72647e-07	4.96843e-11	4.7025e-07	2.31922e-06	5.60452e-11	2.96725e-07	2.16643e-07	3.36191e-07	5.42473e-08
trichloropropane, from hypochlorination of allyl chloride, at plant	kg	chemicals	organics	0	0	0	0	0	0	0	0	0	0	0	0	0	0	0	0	0	0	0	0	0	0	0	0	0	0	0	0	0	0	0	0	0	0	0	0	0	0	0	0	0	0	0	0	0	0
triethanolamine, at plant	kg	chemicals	organics	0	0	0	0	0	0	0	0	0	0	0	0	0	0	0	0	0	0	0	0	0	0	0	0	0	0	0	0	0	0	0	0	0	0	0	0	0	0	0	0	0	0	0	0	0	0
triethylene glycol, at plant	kg	chemicals	organics	6.11766e-08	6.17695e-09	6.5091e-09	1.40111e-08	3.22228e-08	6.17756e-09	8.16014e-09	1.4011e-08	6.67189e-09	6.17785e-09	1.40114e-08	2.39963e-08	1.17287e-08	4.54962e-09	1.75795e-08	3.11672e-08	2.8042e-08	4.70884e-11	7.00841e-09	2.70367e-11	8.67261e-09	4.41019e-08	7.30164e-09	8.67261e-09	3.27128e-08	1.77394e-08	8.42647e-09	2.73911e-08	1.28505e-08	1.2675e-08	2.44848e-08	1.94135e-08	2.66902e-08	4.74877e-08	1.4722e-11	3.27589e-08	1.93137e-08	2.56589e-08	1.2244e-11	2.81455e-08	8.16013e-09	1.36044e-11	1.88776e-08	1.30451e-08	2.2299e-08	7.76763e-09
triethylene glycol, recycling, at plant	kg	chemicals	organics	1.44599e-09	1.46001e-07	1.53851e-07	3.31172e-07	7.61629e-07	1.46015e-07	1.92876e-07	3.31169e-07	1.57699e-07	1.46022e-07	3.31179e-07	5.67184e-07	2.77224e-07	1.07536e-07	4.15514e-07	7.3668e-07	6.62812e-07	1.113e-09	1.65653e-07	6.39049e-10	2.04989e-07	1.04241e-06	1.72584e-07	2.04989e-07	7.73213e-07	4.19296e-07	1.99171e-07	6.47426e-07	3.03739e-07	2.99592e-07	5.78732e-07	4.58864e-07	6.3086e-07	1.12244e-06	3.47975e-10	7.74302e-07	4.56506e-07	6.06484e-07	2.89404e-10	6.65257e-07	1.92876e-07	3.21559e-10	4.46198e-07	3.08338e-07	5.27068e-07	1.83598e-07
trifluoromethane, at plant	kg	chemicals	organics	5.28415e-08	9.59453e-09	9.31658e-09	7.17001e-09	2.32687e-08	9.59547e-09	9.61845e-09	7.17001e-09	9.3041e-09	9.59594e-09	7.17011e-09	2.11623e-08	9.35116e-09	9.26113e-09	1.82974e-08	2.67605e-08	2.4814e-08	2.02254e-11	9.33363e-09	1.24107e-11	1.31747e-08	9.85444e-09	9.37622e-09	1.31747e-08	2.92852e-08	2.44955e-08	1.61002e-08	2.07107e-08	1.72894e-08	1.18336e-08	3.67171e-08	2.00183e-08	2.07183e-08	4.22426e-08	6.56735e-12	3.65008e-08	1.65468e-08	2.9284e-08	5.84151e-12	1.90446e-08	9.61845e-09	6.05774e-12	2.25588e-08	2.01436e-08	1.46573e-08	9.30039e-09
trimethyl borate, at plant	kg	chemicals	organics	4.01057e-11	4.29061e-12	4.82606e-12	7.49893e-12	1.33439e-11	4.29103e-12	7.37214e-12	7.49835e-12	5.54628e-12	4.29124e-12	7.49707e-12	1.35728e-11	5.53829e-12	3.85842e-12	1.0775e-11	1.50151e-11	1.40402e-11	6.77559e-14	4.46238e-12	3.51609e-14	5.71978e-12	1.24537e-11	3.66138e-12	5.71916e-12	1.86089e-11	3.90368e-08	6.14357e-12	1.19819e-11	6.75468e-12	8.02139e-12	1.42637e-11	9.32255e-12	1.19375e-11	2.31411e-11	2.01092e-14	4.2579e-11	9.10062e-12	1.25588e-11	1.50129e-14	1.6074e-11	7.37707e-12	1.86024e-14	1.16212e-11	1.21456e-11	1.22703e-11	3.94041e-12
trimethylamine, at plant	kg	chemicals	organics	7.39843e-06	1.33776e-06	1.40897e-06	1.14994e-06	3.37536e-06	1.33789e-06	2.6995e-06	1.14994e-06	1.41686e-06	1.33796e-06	1.14995e-06	3.08603e-06	1.33383e-06	1.28945e-06	2.75207e-06	3.88022e-06	3.62075e-06	2.86678e-09	1.64274e-06	1.75364e-09	2.29168e-06	1.40566e-06	1.30799e-06	2.29169e-06	4.09898e-06	3.5193e-06	2.24212e-06	2.8987e-06	2.41091e-06	1.65392e-06	5.11788e-06	0.141003	2.8996e-06	5.90679e-06	9.29214e-10	5.27366e-06	2.31424e-06	4.08703e-06	8.24017e-10	2.87208e-06	2.6995e-06	8.5717e-10	3.24667e-06	2.87029e-06	2.19497e-06	1.29768e-06
urea, as N, at regional storehouse	kg	chemicals	organics	5.6131e-05	4.25734e-05	1.37278e-05	3.00369e-05	3.98989e-05	4.25777e-05	1.87681e-05	3.00366e-05	2.13047e-05	4.25796e-05	3.00373e-05	4.23791e-05	1.09943e-05	5.9022e-06	1.9327e-05	3.95913e-05	3.49305e-05	1.26525e-07	1.85578e-05	6.73282e-08	1.41646e-05	2.0441e-05	0.000606357	1.41646e-05	4.13145e-05	0.000566652	1.25168e-05	1.89239e-05	1.42519e-05	2.92548e-05	3.10129e-05	2.20647e-05	1.92372e-05	3.99528e-05	3.85992e-08	3.22765e-05	1.53344e-05	2.3424e-05	3.02372e-08	3.55072e-05	1.87681e-05	3.53674e-08	3.0631e-05	0.000375341	2.70831e-05	1.81526e-05
vinyl acetate, at plant	kg	plastics	monomers	4.28434e-05	4.08684e-05	1.1193e-05	2.4204e-05	3.27554e-05	4.08725e-05	1.34116e-05	2.42037e-05	1.80377e-05	4.08744e-05	2.42043e-05	3.39716e-05	7.56783e-06	5.33097e-06	1.4141e-05	3.15207e-05	2.75234e-05	1.05659e-07	1.63089e-05	5.62533e-08	1.19565e-05	9.84902e-06	0.000605073	1.19565e-05	2.96391e-05	4.52631e-05	1.22022e-05	1.35343e-05	1.27259e-05	2.25869e-05	2.55716e-05	1.43634e-05	1.39684e-05	2.94052e-05	3.23531e-08	2.46477e-05	1.12749e-05	1.77395e-05	2.54769e-08	2.43498e-05	1.34116e-05	2.95834e-08	2.45982e-05	0.000371944	1.83917e-05	1.65586e-05
vinyl chloride, at plant	kg	plastics	monomers	2.42336e-05	3.74688e-05	7.90168e-06	2.12256e-05	2.43446e-05	3.74726e-05	9.93241e-06	2.12253e-05	1.46046e-05	3.74743e-05	2.12258e-05	2.62365e-05	4.2061e-06	2.22002e-06	7.63227e-06	2.20419e-05	1.87277e-05	8.43804e-08	1.30787e-05	4.61062e-08	7.32525e-06	5.85061e-06	0.000601879	7.32525e-06	1.91617e-05	1.77184e-05	6.77475e-06	6.2654e-06	6.82986e-06	1.77855e-05	1.29079e-05	7.40243e-06	6.74038e-06	1.46812e-05	2.63113e-08	1.2009e-05	5.51675e-06	7.58197e-06	2.14211e-08	1.72331e-05	9.93238e-06	2.39832e-08	1.66852e-05	0.000364921	1.2879e-05	1.33285e-05
vinyl fluoride, at plant	kg	chemicals	organics	4.4077e-08	2.8812e-09	3.32918e-09	1.19169e-08	2.49047e-08	2.88149e-09	4.93458e-09	1.19168e-08	3.50323e-09	2.88162e-09	1.19172e-08	1.71339e-08	8.74009e-09	1.31288e-09	1.15212e-08	2.25207e-08	1.99908e-08	4.14812e-11	3.8417e-09	2.35218e-11	4.15439e-09	4.21946e-08	4.13019e-09	4.15439e-09	2.31972e-08	9.40349e-09	2.81974e-09	2.08268e-08	6.97844e-09	8.80797e-09	1.19047e-08	1.27946e-08	2.00959e-08	3.37714e-08	1.28786e-11	2.05831e-08	1.39688e-08	1.58656e-08	1.05704e-11	2.22267e-08	4.93457e-09	1.19051e-11	1.12996e-08	6.12856e-09	1.77686e-08	4.64239e-09
xylene, at plant	kg	chemicals	organics	4.53102e-05	4.1194e-05	1.14409e-05	2.46931e-05	3.29327e-05	4.11982e-05	1.37561e-05	2.46928e-05	1.83952e-05	4.12001e-05	2.46934e-05	3.46943e-05	7.99999e-06	5.37964e-06	1.52566e-05	3.19231e-05	2.80898e-05	1.06099e-07	1.63905e-05	5.83519e-08	1.31517e-05	1.03427e-05	0.000605173	1.31517e-05	3.06851e-05	3.73867e-05	1.26951e-05	1.36232e-05	1.31155e-05	2.68783e-05	2.74813e-05	1.49285e-05	1.38373e-05	2.9752e-05	3.30526e-08	2.536e-05	1.12812e-05	1.881e-05	2.6922e-08	2.57995e-05	1.37561e-05	3.02018e-08	2.51415e-05	0.000372619	1.97071e-05	1.67934e-05
[truncated: 133 more columns]

## Sheet: Life Cycle Toxicity
		Ecoinvent category		Life Cycle Toxicity i
Unit Process Name	Unit	Ecocat	Ecosubcat	USEtox Results Cancer	USEtox Results Non-Cancer
1,1-difluoroethane, HFC-152a, at plant	kg	chemicals	organics	2.9477e-07	3.9625e-07
1,1-dimethylcyclopentane, from naphtha, at plant	kg	chemicals	organics	4.4478e-08	7.7127e-08
1-butanol, propylene hydroformylation, at plant	kg	chemicals	organics	5.6903e-08	1.0705e-07
1-pentanol, at plant	kg	chemicals	organics	9.8923e-08	2.6377e-07
1-propanol, at plant	kg	chemicals	organics	1.6122e-07	2.8417e-07
2,3-dimethylbutan, from naphtha, at plant	kg	chemicals	organics	4.4482e-08	7.7135e-08
2-butanol, at plant	kg	chemicals	organics	7.9972e-08	1.5564e-07
2-methyl-1-butanol, at plant	kg	chemicals	organics	9.8921e-08	2.6377e-07
2-methyl-2-butanol, at plant	kg	chemicals	organics	5.3656e-08	2.0603e-07
2-methylpentane, from naphtha, at plant	kg	chemicals	organics	4.4484e-08	7.7138e-08
3-methyl-1-butanol, at plant	kg	chemicals	organics	9.8923e-08	2.6377e-07
3-methyl-1-butyl acetate, at plant	kg	chemicals	organics	1.4235e-07	3.0852e-07
4-methyl-2-pentanone, at plant	kg	chemicals	organics	1.1996e-07	9.5844e-08
acetaldehyde, at plant	kg	chemicals	organics	3.9679e-08	4.5437e-08
acetic anhydride from acetaldehyde, at plant	kg	chemicals	organics	1.0311e-07	1.2881e-07
acetic anhydride from ketene, at plant	kg	chemicals	organics	1.5232e-07	2.122e-07
acetic anhydride, at plant	kg	chemicals	organics	1.41e-07	1.9302e-07
acetone cyanohydrin, at plant	kg	chemicals	organics	1.2423e-07	2.4657e-08
acetone from butane, at plant	kg	chemicals	organics	3.8365e-08	8.4546e-08
acetone, liquid, at plant	kg	chemicals	organics	4.5793e-08	1.5346e-08
acetonitrile, at plant	kg	chemicals	organics	6.7802e-08	8.7008e-08
acetylene, at regional storehouse	kg	chemicals	organics	1.859e-07	1.4025e-07
acrylic acid, at plant	kg	chemicals	organics	5.2609e-08	4.3428e-08
acrylonitrile from Sohio process, at plant	kg	chemicals	organics	6.7802e-08	8.7008e-08
adipic acid, at plant	kg	chemicals	organics	1.9416e-07	2.9813e-07
AKD sizer, in paper production, at plant	kg	chemicals	organics	9.9208e-08	1.8725e-07
alkylbenzene, linear, at plant	kg	chemicals	organics	5.2131e-08	7.9394e-08
allyl chloride, from reacting propylene and chlorine, at plant	kg	chemicals	organics	1.3619e-07	6.1472e-07
ammonium carbonate, at plant	kg	chemicals	organics	5.6839e-08	9.1611e-08
ammonium thiocyanate, at plant	kg	chemicals	organics	8.2276e-08	1.6461e-07
aniline, at plant	kg	chemicals	organics	1.5718e-07	2.4982e-07
anionic resin, at plant	kg	chemicals	organics	1.2271e-07	2.7601e-07
benzal chloride, at plant	kg	chemicals	organics	1.3229e-07	5.7377e-07
benzaldehyde, at plant	kg	chemicals	organics	2.3849e-07	9.7131e-07
benzene, at plant	kg	chemicals	organics	3.1455e-08	3.565e-09
benzyl alcohol, at plant	kg	chemicals	organics	1.8041e-07	5.5222e-07
benzyl chloride, at plant	kg	chemicals	organics	1.0431e-07	3.8636e-07
bisphenol A, powder, at plant	kg	chemicals	organics	1.6635e-07	1.4884e-07
butadiene, at plant	kg	plastics	monomers	1.3728e-08	1.6071e-09
butane-1,4-diol, at plant	kg	chemicals	organics	1.5641e-07	2.4437e-07
butanes from butenes, at plant	kg	chemicals	organics	7.9971e-08	1.5564e-07
butene, mixed, at plant	kg	plastics	monomers	2.9022e-08	4.2468e-09
butyl acetate, at plant	kg	chemicals	organics	1.1174e-07	1.932e-07
butyl acrylate, at plant	kg	chemicals	organics	1.0837e-07	1.6587e-07
butyrolactone	kg	chemicals	organics	1.2212e-07	1.816e-07
carbon disulfide, at plant	kg	chemicals	organics	3.8417e-08	5.4404e-08
carbon tetrachloride, at plant	kg	chemicals	organics	1.2806e-07	4.2969e-07
cationic resin, at plant	kg	chemicals	organics	4.9121e-08	4.4839e-08
chemicals organic, at plant	kg	chemicals	organics	6.8234e-08	7.7859e-08
chloroacetic acid, at plant	kg	chemicals	organics	1.5376e-07	5.3314e-07
chlorodifluoromethane, at plant	kg	chemicals	organics	4.4737e-07	1.3974e-06
chloromethyl methyl ether, at plant	kg	chemicals	organics	1.1323e-07	2.3561e-07
cumene, at plant	kg	chemicals	organics	6.4068e-08	4.4887e-08
cyclohexane, at plant	kg	chemicals	organics	5.8021e-08	5.5848e-08
cyclohexanol, at plant	kg	chemicals	organics	1.1013e-07	9.706e-08
cyclohexanone, at plant	kg	chemicals	organics	1.0815e-07	2.2319e-07
dichloromethane, at plant	kg	chemicals	organics	1.6586e-07	4.3407e-07
dichloropropene, from reacting propylene and chlorine, at plant	kg	chemicals	organics	1.2612e-07	5.693e-07
diethanolamine, at plant	kg	chemicals	organics	1.1916e-07	1.5695e-07
diethyl ether, at plant	kg	chemicals	organics	3.2147e-08	3.7578e-08
diethylene glycol, at plant	kg	chemicals	organics	5.1124e-08	5.1461e-08
dimethyl ether, at plant	kg	chemicals	organics	5.4403e-08	6.5075e-08
dimethyl sulfoxide, at plant	kg	chemicals	organics	6.0634e-08	7.5251e-08
dimethyl sulphate, at plant	kg	chemicals	organics	8.1824e-08	1.1245e-07
dimethylacetamide, at plant	kg	chemicals	organics	1.2126e-07	1.5076e-07
dimethylamine borane, at plant	kg	chemicals	organics	1.6134e-07	2.323e-07
dimethylamine, at plant	kg	chemicals	organics	4.8014e-08	6.9618e-08
dioxane, at plant	kg	chemicals	organics	1.2511e-07	1.8216e-07
dipropylene glycol monomethyl ether, at plant	kg	chemicals	organics	2.9151e-07	1.337e-06
DTPA, diethylenetriaminepentaacetic acid, at plant	kg	chemicals	organics	2.688e-07	6.2409e-07
EDTA, ethylenediaminetetraacetic acid, at plant	kg	chemicals	organics	2.688e-07	6.2409e-07
epichlorohydrin, from hypochlorination of allyl chloride, at plant	kg	chemicals	organics	2.0824e-07	9.0196e-07
epoxy resin insulator (Al2O3), at plant	kg	plastics	monomers	1.0344e-06	4.3584e-07
epoxy resin insulator (SiO2), at plant	kg	plastics	monomers	1.5363e-07	3.4807e-07
epoxy resin, liquid, at plant	kg	plastics	monomers	3.7843e-07	8.6129e-07
ethanol from ethylene, at plant	kg	chemicals	organics	3.2162e-08	3.7596e-08
ethyl acetate from butane, at plant	kg	chemicals	organics	3.8366e-08	8.4547e-08
ethyl acetate, at plant	kg	chemicals	organics	1.0981e-07	1.643e-07
ethyl benzene, at plant	kg	chemicals	organics	6.3145e-08	4.4616e-08
ethylene carbonate, at plant	kg	chemicals	organics	6.438e-08	7.7861e-08
ethylene dichloride, at plant	kg	chemicals	organics	9.444e-08	4.4401e-07
ethylene glycol diethyl ether, at plant	kg	chemicals	organics	1.7872e-07	5.0268e-07
ethylene glycol dimethyl ether, at plant	kg	chemicals	organics	9.4048e-08	1.023e-07
ethylene glycol monoethyl ether, at plant	kg	chemicals	organics	8.209e-08	8.7516e-08
ethylene glycol, at plant	kg	chemicals	organics	7.5248e-08	7.5743e-08
ethylene oxide, at plant	kg	chemicals	organics	6.4009e-08	5.1524e-08
ethylene, average, at plant	kg	plastics	monomers	2.3471e-08	3.3294e-09
ethylene, pipeline system, at plant	kg	plastics	monomers	1.9738e-08	3.6697e-09
ethylenediamine, at plant	kg	chemicals	organics	3.8189e-07	1.6557e-06
fatty acids, from vegetarian oil, at plant	kg	chemicals	organics	6.422e-08	1.395e-07
fatty alcohol, from coconut oil, at plant	kg	chemicals	organics	5.8676e-08	9.5117e-08
fatty alcohol, from palm kernel oil, at plant	kg	chemicals	organics	9.7163e-08	2.4479e-07
fatty alcohol, from palm oil, at plant	kg	chemicals	organics	6.4372e-08	1.4704e-07
fatty alcohol, petrochemical, at plant	kg	chemicals	organics	7.2974e-08	9.3831e-08
formaldehyde, production mix, at plant	kg	chemicals	organics	3.9427e-08	5.1316e-08
formic acid from butane, at plant	kg	chemicals	organics	3.8361e-08	8.4537e-08
formic acid from methyl formate, at plant	kg	chemicals	organics	1.2087e-07	1.8792e-07
fraction 1, from naphtha, at plant	kg	chemicals	organics	4.4481e-08	7.7133e-08
fraction 7, from naphtha, at plant	kg	chemicals	organics	4.4476e-08	7.7123e-08
fraction 8, from naphtha, at plant	kg	chemicals	organics	4.448e-08	7.7131e-08
glycerine, from epichlorohydrin, at plant	kg	chemicals	organics	2.8634e-07	1.237e-06
heptane, at plant	kg	chemicals	organics	4.4482e-08	7.7134e-08
hexafluorethane, at plant	kg	chemicals	organics	8.7159e-07	3.3326e-06
hexamethyldisilazane, at plant	kg	chemicals	organics	1.2151e-07	1.765e-07
hexane, at plant	kg	chemicals	organics	4.4483e-08	7.7136e-08
hydrogen cyanide, at plant	kg	chemicals	organics	2.5439e-07	2.3509e-08
isobutanol, at plant	kg	chemicals	organics	5.69e-08	1.0705e-07
isobutyl acetate, at plant	kg	chemicals	organics	1.1518e-07	1.9827e-07
isohexane, at plant	kg	chemicals	organics	6.2207e-08	1.1247e-07
isopropanol, at plant	kg	chemicals	organics	4.8558e-08	4.9049e-08
isopropyl acetate, at plant	kg	chemicals	organics	1.1356e-07	1.6418e-07
maleic anhydride from catalytic oxidation of benzene, at plant	kg	chemicals	organics	7.0095e-08	4.6131e-08
maleic anhydride from the direct oxidation of n-butane, at plant	kg	chemicals	organics	8.2888e-08	9.6434e-08
maleic anhydride, at plant	kg	chemicals	organics	7.969e-08	8.3858e-08
melamine, at plant	kg	chemicals	organics	1.6538e-07	2.7713e-07
methanol, at plant	kg	chemicals	organics	1.4263e-08	1.5579e-08
methanol, at regional storage	kg	chemicals	organics	1.8091e-08	1.9002e-08
methyl acetate, at plant	kg	chemicals	organics	3.8363e-08	8.4541e-08
methyl acrylate, at plant	kg	chemicals	organics	7.445e-08	8.0031e-08
methyl ethyl ketone from butane, at plant	kg	chemicals	organics	3.8364e-08	8.4544e-08
methyl ethyl ketone, at plant	kg	chemicals	organics	5.445e-08	4.3379e-08
methyl formate, at plant	kg	chemicals	organics	1.355e-07	1.4938e-07
methyl methacrylate, at plant	kg	plastics	monomers	1.8162e-07	3.0012e-08
methyl tert-butyl ether, at plant	kg	chemicals	organics	3.3015e-08	3.9418e-08
methyl-3-methoxypropionate, at plant	kg	chemicals	organics	9.2964e-08	1.0677e-07
methylamine, at plant	kg	chemicals	organics	7.4208e-08	1.2055e-07
methylchloride, at plant	kg	chemicals	organics	1.2423e-07	4.2952e-07
methylchloride, at regional storage	kg	chemicals	organics	1.3088e-07	4.3702e-07
methylcyclohexane, at plant	kg	chemicals	organics	9.0367e-08	1.7327e-07
methylcyclohexane, from naphtha, at plant	kg	chemicals	organics	4.4482e-08	7.7134e-08
methylcyclopentane, from naphtha, at plant	kg	chemicals	organics	4.4482e-08	7.7134e-08
methylene diphenyl diisocyanate, at plant	kg	plastics	monomers	1.8883e-07	1.7068e-07
monochlorobenzene, at plant	kg	chemicals	organics	1.3646e-07	4.3473e-07
monochloropentafluoroethane, at plant	kg	chemicals	organics	8.7161e-07	3.3327e-06
monoethanolamine, at plant	kg	chemicals	organics	1.1145e-07	1.5075e-07
N,N-dimethylformamide, at plant	kg	chemicals	organics	1.016e-07	1.3125e-07
nitrobenzene, at plant	kg	chemicals	organics	8.0373e-08	9.488e-08
N-methyl-2-pyrrolidone, at plant	kg	chemicals	organics	1.6011e-07	2.3048e-07
n-olefins, at plant	kg	chemicals	organics	5.3482e-08	5.9767e-08
o-dichlorobenzene, at plant	kg	chemicals	organics	1.3646e-07	4.3472e-07
paraffin, at plant	kg	chemicals	organics	2.1393e-08	4.2295e-08
p-dichlorobenzene, at plant	kg	chemicals	organics	1.3645e-07	4.347e-07
penta-erythritol, at plant	kg	chemicals	organics	1.4842e-07	1.7066e-07
pentane, at plant	kg	chemicals	organics	1.2313e-08	1.7539e-09
phenol, at plant	kg	chemicals	organics	1.316e-07	1.1068e-07
phosgene, liquid, at plant	kg	chemicals	organics	1.3853e-07	4.7993e-07
phthalic anhydride, at plant	kg	chemicals	organics	7.9034e-08	6.8158e-08
polyols, at plant	kg	plastics	monomers	2.372e-07	1.9073e-07
polyvinylfluoride film, at plant	kg	chemicals	organics	8.0165e-07	9.1272e-07
polyvinylfluoride, at plant	kg	chemicals	organics	6.3346e-07	7.2148e-07
polyvinylfluoride, dispersion, at plant	kg	chemicals	organics	7.6269e-07	8.6415e-07
propanal, at plant	kg	chemicals	organics	1.1746e-07	2.3474e-07
propylene glycol, liquid, at plant	kg	chemicals	organics	2.8031e-07	1.298e-06
propylene oxide, liquid, at plant	kg	chemicals	organics	3.0806e-07	1.5317e-06
propylene, at plant	kg	plastics	monomers	2.5287e-08	3.5483e-09
propylene, pipeline system, at plant	kg	plastics	monomers	2.2571e-08	4.345e-09
refrigerant R134a, at plant	kg	chemicals	organics	5.689e-07	1.2173e-06
sodium formate, reaction of formaldehyde with acetaldehyde, at plant	kg	chemicals	organics	2.6176e-08	3.0099e-08
sodium methoxide, at plant	kg	chemicals	organics	3.374e-07	6.6576e-07
solvents, organic, unspecified, at plant	kg	chemicals	organics	8.4317e-08	1.0461e-07
styrene, at plant	kg	plastics	monomers	2.8407e-07	1.0162e-07
tetrachloroethylene, at plant	kg	chemicals	organics	1.4647e-07	4.3852e-07
tetrahydrofuran, at plant	kg	chemicals	organics	2.2091e-07	3.5194e-07
toluene diisocyanate, at plant	kg	plastics	monomers	1.6179e-07	7.2339e-08
toluene, liquid, at plant	kg	chemicals	organics	2.2957e-08	2.854e-09
trichloroethylene, at plant	kg	chemicals	organics	2.0812e-07	4.4717e-07
trichloromethane, at plant	kg	chemicals	organics	1.6981e-07	6.9627e-07
trichloropropane, from hypochlorination of allyl chloride, at plant	kg	chemicals	organics	1.9656e-07	8.5137e-07
triethanolamine, at plant	kg	chemicals	organics	1.2216e-07	1.5937e-07
triethylene glycol, at plant	kg	chemicals	organics	1.4607e-07	1.4703e-07
triethylene glycol, recycling, at plant	kg	chemicals	organics	4.8611e-08	3.4785e-08
trifluoromethane, at plant	kg	chemicals	organics	5.596e-07	1.5731e-06
trimethyl borate, at plant	kg	chemicals	organics	7.0669e-08	9.8666e-08
trimethylamine, at plant	kg	chemicals	organics	6.8908e-08	9.6479e-08
urea, as N, at regional storehouse	kg	chemicals	organics	8.9952e-08	1.649e-07
vinyl acetate, at plant	kg	plastics	monomers	1.0677e-07	1.154e-07
vinyl chloride, at plant	kg	plastics	monomers	8.8268e-08	2.102e-07
vinyl fluoride, at plant	kg	chemicals	organics	3.8282e-07	5.1179e-07
xylene, at plant	kg	chemicals	organics	3.1842e-08	3.7309e-09

## Sheet: USEtox Effect Factors
		Ecoinvent category		USEtox Effect Factors (EFs)
Unit Process Name	Unit	Ecocat	Ecosubcat	Inhalation Cancer	Inhalation non-Cancer	Ingestion Cancer	Ingestion non-Cancer
1,1-difluoroethane, HFC-152a, at plant	kg	chemicals	organics	0	0	0	0
1,1-dimethylcyclopentane, from naphtha, at plant	kg	chemicals	organics	0	0	0	0
1-butanol, propylene hydroformylation, at plant	kg	chemicals	organics	0	0.002	0	0.002
1-pentanol, at plant	kg	chemicals	organics	0	0	0	0
1-propanol, at plant	kg	chemicals	organics	0	0	0	0
2,3-dimethylbutan, from naphtha, at plant	kg	chemicals	organics	0	0	0	0
2-butanol, at plant	kg	chemicals	organics	0	0	0	0
2-methyl-1-butanol, at plant	kg	chemicals	organics	0	0	0	0
2-methyl-2-butanol, at plant	kg	chemicals	organics	0	0	0	0
2-methylpentane, from naphtha, at plant	kg	chemicals	organics	0	0	0	0
3-methyl-1-butanol, at plant	kg	chemicals	organics	0	0	0	0
3-methyl-1-butyl acetate, at plant	kg	chemicals	organics	0	0	0	0
4-methyl-2-pentanone, at plant	kg	chemicals	organics	0	0.00016	0	0.00016
acetaldehyde, at plant	kg	chemicals	organics	0.0075	0.038	0.0075	0.038
acetic anhydride from acetaldehyde, at plant	kg	chemicals	organics	0	0	0	0
acetic anhydride from ketene, at plant	kg	chemicals	organics	0	0	0	0
acetic anhydride, at plant	kg	chemicals	organics	0	0	0	0
acetone cyanohydrin, at plant	kg	chemicals	organics	0	0	0	0
acetone from butane, at plant	kg	chemicals	organics	0	0.00028	0	0.00028
acetone, liquid, at plant	kg	chemicals	organics	0	0.00028	0	0.00028
acetonitrile, at plant	kg	chemicals	organics	0	0.0028	0	0.0028
acetylene, at regional storehouse	kg	chemicals	organics	0	0	0	0
acrylic acid, at plant	kg	chemicals	organics	0	4.1	0	0.0024
acrylonitrile from Sohio process, at plant	kg	chemicals	organics	0.13	0.35	0.32	0.35
adipic acid, at plant	kg	chemicals	organics	0	0	0	0
AKD sizer, in paper production, at plant	kg	chemicals	organics	0	0	0	0
alkylbenzene, linear, at plant	kg	chemicals	organics	0	0	0	0
allyl chloride, from reacting propylene and chlorine, at plant	kg	chemicals	organics	0	0.093	0	0.093
ammonium carbonate, at plant	kg	chemicals	organics	0	0	0	0
ammonium thiocyanate, at plant	kg	chemicals	organics	0	0	0	0
aniline, at plant	kg	chemicals	organics	0.002	0.098	0.002	0.098
anionic resin, at plant	kg	chemicals	organics	0	0	0	0
benzal chloride, at plant	kg	chemicals	organics	0	0	0	0
benzaldehyde, at plant	kg	chemicals	organics	0.0014	0.0018	0.0014	0.0018
benzene, at plant	kg	chemicals	organics	0.015	0.0037	0.015	0.0037
benzyl alcohol, at plant	kg	chemicals	organics	0	0	0	0
benzyl chloride, at plant	kg	chemicals	organics	0.033	0	0.033	0
bisphenol A, powder, at plant	kg	chemicals	organics	0	0.01	0	0.01
butadiene, at plant	kg	plastics	monomers	0.056	0.084	0.056	0.084
butane-1,4-diol, at plant	kg	chemicals	organics	0	0	0	0
butanes from butenes, at plant	kg	chemicals	organics	0	0	0	0
butene, mixed, at plant	kg	plastics	monomers	0	0	0	0
butyl acetate, at plant	kg	chemicals	organics	0	0	0	0
butyl acrylate, at plant	kg	chemicals	organics	0	0	0	0
butyrolactone	kg	chemicals	organics	0	0	0	0
carbon disulfide, at plant	kg	chemicals	organics	0	0.26	0	0.0069
carbon tetrachloride, at plant	kg	chemicals	organics	0.11	0.36	0.014	0.36
cationic resin, at plant	kg	chemicals	organics	0	0	0	0
chemicals organic, at plant	kg	chemicals	organics	0.015	0.0037	0.015	0.0037
chloroacetic acid, at plant	kg	chemicals	organics	0	0	0	0
chlorodifluoromethane, at plant	kg	chemicals	organics	0	3.2e-05	0	3.2e-05
chloromethyl methyl ether, at plant	kg	chemicals	organics	0.21	0	0.21	0
cumene, at plant	kg	chemicals	organics	0	0.00077	0	0.0023
cyclohexane, at plant	kg	chemicals	organics	0	0.00083	0	0.00083
cyclohexanol, at plant	kg	chemicals	organics	0	0	0	0
cyclohexanone, at plant	kg	chemicals	organics	0	0.00028	0	0.00028
dichloromethane, at plant	kg	chemicals	organics	0.0019	0.022	0.0026	0.022
dichloropropene, from reacting propylene and chlorine, at plant	kg	chemicals	organics	0.041	10	0.041	0.068
diethanolamine, at plant	kg	chemicals	organics	0	0	0	0
diethyl ether, at plant	kg	chemicals	organics	0	0.00051	0	0.00051
diethylene glycol, at plant	kg	chemicals	organics	0.00069	0	0.00069	0
dimethyl ether, at plant	kg	chemicals	organics	0	0	0	0
dimethyl sulfoxide, at plant	kg	chemicals	organics	0	0	0	0
dimethyl sulphate, at plant	kg	chemicals	organics	0	0	0	0
dimethylacetamide, at plant	kg	chemicals	organics	0	0	0	0
dimethylamine borane, at plant	kg	chemicals	organics	0	0	0	0
dimethylamine, at plant	kg	chemicals	organics	0	0	0	0
dioxane, at plant	kg	chemicals	organics	0.01	0	0.01	0
dipropylene glycol monomethyl ether, at plant	kg	chemicals	organics	0	0	0	0
DTPA, diethylenetriaminepentaacetic acid, at plant	kg	chemicals	organics	0	0	0	0
EDTA, ethylenediaminetetraacetic acid, at plant	kg	chemicals	organics	0	0	0	0
epichlorohydrin, from hypochlorination of allyl chloride, at plant	kg	chemicals	organics	0.0023	0.46	0.39	0.46
epoxy resin insulator (Al2O3), at plant	kg	plastics	monomers	0	0	0	0
epoxy resin insulator (SiO2), at plant	kg	plastics	monomers	0	0	0	0
epoxy resin, liquid, at plant	kg	plastics	monomers	0	0	0	0
ethanol from ethylene, at plant	kg	chemicals	organics	0.00013	0	0.00013	0
ethyl acetate from butane, at plant	kg	chemicals	organics	0	0.00028	0	0.00028
ethyl acetate, at plant	kg	chemicals	organics	0	0.00028	0	0.00028
ethyl benzene, at plant	kg	chemicals	organics	0.024	0.00039	0.00026	0.0026
ethylene carbonate, at plant	kg	chemicals	organics	0	0	0	0
ethylene dichloride, at plant	kg	chemicals	organics	0.014	0	0.14	0
ethylene glycol diethyl ether, at plant	kg	chemicals	organics	0	0	0	0
ethylene glycol dimethyl ether, at plant	kg	chemicals	organics	0	0	0	0
ethylene glycol monoethyl ether, at plant	kg	chemicals	organics	0	0.02	0	0.02
ethylene glycol, at plant	kg	chemicals	organics	0	0.00064	0	0.00064
ethylene oxide, at plant	kg	chemicals	organics	0.032	0	0.15	0
ethylene, average, at plant	kg	plastics	monomers	0	0	0	0
ethylene, pipeline system, at plant	kg	plastics	monomers	0	0	0	0
ethylenediamine, at plant	kg	chemicals	organics	0	0	0	0
fatty acids, from vegetarian oil, at plant	kg	chemicals	organics	0	0	0	0
fatty alcohol, from coconut oil, at plant	kg	chemicals	organics	0	0	0	0
fatty alcohol, from palm kernel oil, at plant	kg	chemicals	organics	0	0	0	0
fatty alcohol, from palm oil, at plant	kg	chemicals	organics	0	0	0	0
fatty alcohol, petrochemical, at plant	kg	chemicals	organics	0	0	0	0
formaldehyde, production mix, at plant	kg	chemicals	organics	1.1	0.0085	0.0021	0.0085
formic acid from butane, at plant	kg	chemicals	organics	0	0	0	0
formic acid from methyl formate, at plant	kg	chemicals	organics	0	0	0	0
fraction 1, from naphtha, at plant	kg	chemicals	organics	0	0	0	0
fraction 7, from naphtha, at plant	kg	chemicals	organics	0	0	0	0
fraction 8, from naphtha, at plant	kg	chemicals	organics	0	0	0	0
glycerine, from epichlorohydrin, at plant	kg	chemicals	organics	0	0	0	0
heptane, at plant	kg	chemicals	organics	0	0	0	0
hexafluorethane, at plant	kg	chemicals	organics	0	0	0	0
hexamethyldisilazane, at plant	kg	chemicals	organics	0	0	0	0
hexane, at plant	kg	chemicals	organics	6.7e-05	0.0092	6.7e-05	0.0092
hydrogen cyanide, at plant	kg	chemicals	organics	0	0.0029	0	0.12
isobutanol, at plant	kg	chemicals	organics	0	0.0008	0	0.0008
isobutyl acetate, at plant	kg	chemicals	organics	0	0	0	0
isohexane, at plant	kg	chemicals	organics	0	0	0	0
isopropanol, at plant	kg	chemicals	organics	0	0	0	0
isopropyl acetate, at plant	kg	chemicals	organics	0	0	0	0
maleic anhydride from catalytic oxidation of benzene, at plant	kg	chemicals	organics	0	0.013	0	0.013
maleic anhydride from the direct oxidation of n-butane, at plant	kg	chemicals	organics	0	0.013	0	0.013
maleic anhydride, at plant	kg	chemicals	organics	0	0.013	0	0.013
melamine, at plant	kg	chemicals	organics	0.0016	0	0.0016	0
methanol, at plant	kg	chemicals	organics	0	0.00051	0	0.00051
methanol, at regional storage	kg	chemicals	organics	0	0.00051	0	0.00051
methyl acetate, at plant	kg	chemicals	organics	0	0	0	0
methyl acrylate, at plant	kg	chemicals	organics	0	0	0	0
methyl ethyl ketone from butane, at plant	kg	chemicals	organics	0	3e-05	0	0.00057
methyl ethyl ketone, at plant	kg	chemicals	organics	0	3e-05	0	0.00057
methyl formate, at plant	kg	chemicals	organics	0	0	0	0
methyl methacrylate, at plant	kg	plastics	monomers	0	0.081	0	0.00093
methyl tert-butyl ether, at plant	kg	chemicals	organics	0.0039	0.00065	0.00052	0.00065
methyl-3-methoxypropionate, at plant	kg	chemicals	organics	0	0	0	0
methylamine, at plant	kg	chemicals	organics	0	0	0	0
methylchloride, at plant	kg	chemicals	organics	0	0.0088	0	0.0088
methylchloride, at regional storage	kg	chemicals	organics	0	0.0088	0	0.0088
methylcyclohexane, at plant	kg	chemicals	organics	0	0	0	0
methylcyclohexane, from naphtha, at plant	kg	chemicals	organics	0	0	0	0
methylcyclopentane, from naphtha, at plant	kg	chemicals	organics	0	0	0	0
methylene diphenyl diisocyanate, at plant	kg	plastics	monomers	0	0	0	0
monochlorobenzene, at plant	kg	chemicals	organics	0.0046	0.0048	0.0046	0.0048
monochloropentafluoroethane, at plant	kg	chemicals	organics	0	0	0	0
monoethanolamine, at plant	kg	chemicals	organics	0	0	0	0
N,N-dimethylformamide, at plant	kg	chemicals	organics	0	0.085	0	0.085
nitrobenzene, at plant	kg	chemicals	organics	0.045	0.22	0.045	0.22
N-methyl-2-pyrrolidone, at plant	kg	chemicals	organics	0	0	0.001	0
n-olefins, at plant	kg	chemicals	organics	0	0	0	0
o-dichlorobenzene, at plant	kg	chemicals	organics	0	0.0015	0	0.0015
paraffin, at plant	kg	chemicals	organics	0	0	0	0
p-dichlorobenzene, at plant	kg	chemicals	organics	0.0075	0.0022	0.0051	0.0022
penta-erythritol, at plant	kg	chemicals	organics	0	0	0	0
pentane, at plant	kg	chemicals	organics	0	0	0	0
phenol, at plant	kg	chemicals	organics	0	0.0033	0	0.0033
phosgene, liquid, at plant	kg	chemicals	organics	700	140	0	0.0019
phthalic anhydride, at plant	kg	chemicals	organics	0	0.00058	0	0.00058
polyols, at plant	kg	plastics	monomers	0	0	0	0
polyvinylfluoride film, at plant	kg	chemicals	organics	0.25	0	0.25	0
polyvinylfluoride, at plant	kg	chemicals	organics	0.25	0	0.25	0
polyvinylfluoride, dispersion, at plant	kg	chemicals	organics	0.25	0	0.25	0
propanal, at plant	kg	chemicals	organics	0	0	0	0
propylene glycol, liquid, at plant	kg	chemicals	organics	0	0	0	0
propylene oxide, liquid, at plant	kg	chemicals	organics	0.012	0.23	0.029	0.23
propylene, at plant	kg	plastics	monomers	0	0	0	0
propylene, pipeline system, at plant	kg	plastics	monomers	0	0	0	0
refrigerant R134a, at plant	kg	chemicals	organics	3.8e-05	1.4e-05	3.8e-05	1.4e-05
sodium formate, reaction of formaldehyde with acetaldehyde, at plant	kg	chemicals	organics	0	0	0	0
sodium methoxide, at plant	kg	chemicals	organics	0	0	0	0
solvents, organic, unspecified, at plant	kg	chemicals	organics	0.00013	0	0.00013	0
styrene, at plant	kg	plastics	monomers	0.049	0.0098	0	0.00046
tetrachloroethylene, at plant	kg	chemicals	organics	0.0085	0.032	0.022	0.032
tetrahydrofuran, at plant	kg	chemicals	organics	0.0028	0	0.0028	0
toluene diisocyanate, at plant	kg	plastics	monomers	0	84	0.034	84
toluene, liquid, at plant	kg	chemicals	organics	0	0.0036	0.00037	0.0011
trichloroethylene, at plant	kg	chemicals	organics	0.0017	0	0.003	0
trichloromethane, at plant	kg	chemicals	organics	0.0056	0.032	0.023	0.032
trichloropropane, from hypochlorination of allyl chloride, at plant	kg	chemicals	organics	2.3	0.045	2.3	0.045
triethanolamine, at plant	kg	chemicals	organics	0.02	0	0.02	0
triethylene glycol, at plant	kg	chemicals	organics	0	0	0	0
triethylene glycol, recycling, at plant	kg	chemicals	organics	0	0	0	0
trifluoromethane, at plant	kg	chemicals	organics	0	0	0	0
trimethyl borate, at plant	kg	chemicals	organics	0	0	0	0
trimethylamine, at plant	kg	chemicals	organics	0	0	0	0
urea, as N, at regional storehouse	kg	chemicals	organics	0	0	0	0
vinyl acetate, at plant	kg	plastics	monomers	0.001	0.033	0.0057	0.033
vinyl chloride, at plant	kg	plastics	monomers	0.19	0.067	0.15	0.8
vinyl fluoride, at plant	kg	chemicals	organics	0.25	0	0.25	0
xylene, at plant	kg	chemicals	organics	0.00037	0.0086	0.00037	0.00071

## Sheet: Life Cycle Inherent Toxicity
		Ecoinvent category		LC Inherent Toxicity i*
Unit Process Name	Unit	Ecocat	Ecosubcat	Inhalation Cancer	Inhalation non-Cancer	Ingestion Cancer	Ingestion non-Cancer
1,1-difluoroethane, HFC-152a, at plant	kg	chemicals	organics	0.000146469	0.00344892	2.83825e-05	0.0034685
1,1-dimethylcyclopentane, from naphtha, at plant	kg	chemicals	organics	8.7806e-05	2.03924e-05	3.85604e-05	4.61198e-05
1-butanol, propylene hydroformylation, at plant	kg	chemicals	organics	3.18038e-05	5.68922e-06	9.07752e-06	1.02352e-05
1-pentanol, at plant	kg	chemicals	organics	5.76141e-05	1.0202e-05	2.22119e-05	2.44948e-05
1-propanol, at plant	kg	chemicals	organics	9.17575e-05	1.58956e-05	2.63316e-05	3.05643e-05
2,3-dimethylbutan, from naphtha, at plant	kg	chemicals	organics	8.78149e-05	2.03944e-05	3.85643e-05	4.61245e-05
2-butanol, at plant	kg	chemicals	organics	3.81167e-05	6.65154e-06	1.15855e-05	1.25989e-05
2-methyl-1-butanol, at plant	kg	chemicals	organics	5.76135e-05	1.02019e-05	2.22117e-05	2.44946e-05
2-methyl-2-butanol, at plant	kg	chemicals	organics	4.50674e-05	8.19203e-06	1.55515e-05	1.753e-05
2-methylpentane, from naphtha, at plant	kg	chemicals	organics	8.78189e-05	2.03954e-05	3.8566e-05	4.61266e-05
3-methyl-1-butanol, at plant	kg	chemicals	organics	5.76148e-05	1.02021e-05	2.22122e-05	2.44951e-05
3-methyl-1-butyl acetate, at plant	kg	chemicals	organics	9.12798e-05	0.000141271	2.84459e-05	0.000157519
4-methyl-2-pentanone, at plant	kg	chemicals	organics	2.67199e-05	0.000402874	5.18073e-06	0.000404768
acetaldehyde, at plant	kg	chemicals	organics	1.93099e-05	3.44396e-06	2.93146e-06	3.95569e-06
acetic anhydride from acetaldehyde, at plant	kg	chemicals	organics	0.00709272	0.0356903	0.00705195	0.0356936
acetic anhydride from ketene, at plant	kg	chemicals	organics	9.26198e-05	0.000343196	2.46921e-05	0.00035582
acetic anhydride, at plant	kg	chemicals	organics	0.00170264	0.00847303	0.00164096	0.00848352
acetone cyanohydrin, at plant	kg	chemicals	organics	3.0425e-07	4.51622e-08	2.94559e-07	1.02179e-07
acetone from butane, at plant	kg	chemicals	organics	4.1248e-05	7.55465e-06	1.39238e-05	1.58211e-05
acetone, liquid, at plant	kg	chemicals	organics	1.57494e-07	2.42768e-08	1.26076e-07	5.53581e-08
acetonitrile, at plant	kg	chemicals	organics	3.8019e-05	6.96253e-06	8.89998e-06	1.06746e-05
acetylene, at regional storehouse	kg	chemicals	organics	4.10927e-05	5.38302e-06	7.02603e-06	8.33952e-06
acrylic acid, at plant	kg	chemicals	organics	0.0011419	0.000218839	0.000597011	0.000651043
acrylonitrile from Sohio process, at plant	kg	chemicals	organics	3.8019e-05	6.96253e-06	8.89999e-06	1.06746e-05
adipic acid, at plant	kg	chemicals	organics	0.00945178	0.00387868	0.0093814	0.00462446
AKD sizer, in paper production, at plant	kg	chemicals	organics	0.0297681	0.00597672	3.12761e-05	5.58358e-05
alkylbenzene, linear, at plant	kg	chemicals	organics	0.00525933	0.00129533	0.00522806	0.0012983
allyl chloride, from reacting propylene and chlorine, at plant	kg	chemicals	organics	5.26954e-05	1.21916e-05	8.22939e-06	1.42393e-05
ammonium carbonate, at plant	kg	chemicals	organics	0.000189224	7.59562e-06	0.000698744	1.05003e-05
ammonium thiocyanate, at plant	kg	chemicals	organics	6.46027e-05	0.136855	1.97366e-05	0.00365477
aniline, at plant	kg	chemicals	organics	0.0731068	0.295864	0.0730329	0.295869
anionic resin, at plant	kg	chemicals	organics	0.124689	0.00854223	0.0458935	0.00854518
benzal chloride, at plant	kg	chemicals	organics	5.26485e-05	0.00219085	0.000232632	0.000680091
benzaldehyde, at plant	kg	chemicals	organics	0.000107851	0.00348538	0.000374404	0.00108668
benzene, at plant	kg	chemicals	organics	9.11954e-08	1.38751e-08	7.97963e-08	3.16572e-08
benzyl alcohol, at plant	kg	chemicals	organics	0.0390675	0.0032859	0.0393244	0.00102089
benzyl chloride, at plant	kg	chemicals	organics	4.17319e-05	0.00277595	0.000291426	0.000856478
bisphenol A, powder, at plant	kg	chemicals	organics	0.0126617	0.00716521	0.0126036	0.00904517
butadiene, at plant	kg	plastics	monomers	6.8955e-08	1.1e-08	4.66693e-08	2.54688e-08
butane-1,4-diol, at plant	kg	chemicals	organics	0.805934	0.00666111	0.00155829	0.00667123
butanes from butenes, at plant	kg	chemicals	organics	3.81166e-05	6.65153e-06	1.15855e-05	1.25989e-05
butene, mixed, at plant	kg	plastics	monomers	8.37622e-08	1.26965e-08	7.38482e-08	2.88919e-08
butyl acetate, at plant	kg	chemicals	organics	7.26183e-05	0.00143642	1.9e-05	0.0014457
butyl acrylate, at plant	kg	chemicals	organics	0.000718609	2.42028	0.000363588	0.00295341
butyrolactone	kg	chemicals	organics	0.557003	0.00460457	0.00107813	0.00461207
carbon disulfide, at plant	kg	chemicals	organics	4.20105e-05	7.73811e-06	1.42542e-05	1.6187e-05
carbon tetrachloride, at plant	kg	chemicals	organics	6.67099e-07	5.68602e-08	2.80215e-07	9.93731e-08
cationic resin, at plant	kg	chemicals	organics	2.32027e-05	3.96576e-06	3.56731e-06	4.53445e-06
chemicals organic, at plant	kg	chemicals	organics	0.078527	0.0143756	0.034536	0.0502538
chloroacetic acid, at plant	kg	chemicals	organics	7.96037e-05	0.000186108	1.64611e-05	0.000192784
chlorodifluoromethane, at plant	kg	chemicals	organics	0.00916157	0.0512392	0.0368377	0.051252
chloromethyl methyl ether, at plant	kg	chemicals	organics	0.432354	0.00400393	0.000835028	0.00400681
cumene, at plant	kg	chemicals	organics	0.0102805	0.00253433	0.010263	0.00253477
cyclohexane, at plant	kg	chemicals	organics	0.0140755	0.00347038	0.0140584	0.00347116
cyclohexanol, at plant	kg	chemicals	organics	0.0125403	0.00516481	0.012502	0.006148
cyclohexanone, at plant	kg	chemicals	organics	0.0130555	0.00398416	0.0130142	0.00399024
dichloromethane, at plant	kg	chemicals	organics	1.78796e-07	2.19114e-08	2.97519e-07	4.63119e-08
dichloropropene, from reacting propylene and chlorine, at plant	kg	chemicals	organics	4.88019e-05	1.12908e-05	7.62137e-06	1.31873e-05
diethanolamine, at plant	kg	chemicals	organics	0.0274234	1.29239e-05	0.12823	1.96493e-05
diethyl ether, at plant	kg	chemicals	organics	6.66782e-05	1.52999e-05	5.44656e-05	1.65689e-05
diethylene glycol, at plant	kg	chemicals	organics	0.0157698	3.79597e-06	0.0738178	3.91443e-06
dimethyl ether, at plant	kg	chemicals	organics	3.07103e-05	0.000749932	8.12614e-06	0.000753569
dimethyl sulfoxide, at plant	kg	chemicals	organics	3.63789e-05	0.000458385	7.37759e-06	0.000460951
dimethyl sulphate, at plant	kg	chemicals	organics	5.92663e-05	0.000297808	1.08838e-05	0.000301164
dimethylacetamide, at plant	kg	chemicals	organics	7.41019e-05	0.000407695	1.72464e-05	0.000415383
dimethylamine borane, at plant	kg	chemicals	organics	9.78725e-05	0.000343651	1.87866e-05	0.000350282
dimethylamine, at plant	kg	chemicals	organics	2.98085e-05	0.000387005	7.10894e-06	0.000389978
dioxane, at plant	kg	chemicals	organics	0.0220627	1.07919e-05	0.0997298	1.52456e-05
dipropylene glycol monomethyl ether, at plant	kg	chemicals	organics	0.01001	0.189897	0.0239429	0.189901
DTPA, diethylenetriaminepentaacetic acid, at plant	kg	chemicals	organics	0.370404	0.00395019	0.0409184	0.0408334
EDTA, ethylenediaminetetraacetic acid, at plant	kg	chemicals	organics	0.370404	0.00395019	0.0409184	0.0408334
epichlorohydrin, from hypochlorination of allyl chloride, at plant	kg	chemicals	organics	0.000126583	0.0674605	2.82711e-05	0.0674737
epoxy resin insulator (Al2O3), at plant	kg	plastics	monomers	2.03028e-05	4.04776e-06	7.77112e-06	9.0702e-06
epoxy resin insulator (SiO2), at plant	kg	plastics	monomers	3.51128e-06	6.077e-07	1.07874e-06	1.1221e-06
epoxy resin, liquid, at plant	kg	plastics	monomers	2.4128e-06	1.94881e-07	8.40697e-07	3.18166e-07
ethanol from ethylene, at plant	kg	chemicals	organics	6.67098e-05	1.53072e-05	5.44914e-05	1.65767e-05
ethyl acetate from butane, at plant	kg	chemicals	organics	4.12491e-05	7.55398e-06	1.39242e-05	1.58206e-05
ethyl acetate, at plant	kg	chemicals	organics	0.000182833	0.000197925	0.000129987	0.000206378
ethyl benzene, at plant	kg	chemicals	organics	0.0113904	0.00280812	0.0113729	0.00280857
ethylene carbonate, at plant	kg	chemicals	organics	0.0162094	6.69782e-06	0.0758077	7.13509e-06
ethylene dichloride, at plant	kg	chemicals	organics	4.23528e-05	9.61725e-06	5.25832e-06	1.05587e-05
ethylene glycol diethyl ether, at plant	kg	chemicals	organics	0.0197982	0.0166416	0.123708	0.0166445
ethylene glycol dimethyl ether, at plant	kg	chemicals	organics	0.0165159	0.000408847	0.0772018	0.000411515
ethylene glycol monoethyl ether, at plant	kg	chemicals	organics	0.0166053	1.36116e-05	0.0772967	1.50055e-05
ethylene glycol, at plant	kg	chemicals	organics	0.0232109	5.5817e-06	0.108649	5.75606e-06
ethylene oxide, at plant	kg	chemicals	organics	2.14155e-05	3.5995e-06	1.98356e-06	4.11447e-06
ethylene, average, at plant	kg	plastics	monomers	7.969e-08	1.23114e-08	6.45448e-08	2.82304e-08
ethylene, pipeline system, at plant	kg	plastics	monomers	7.59991e-08	1.18104e-08	5.75688e-08	2.69002e-08
ethylenediamine, at plant	kg	chemicals	organics	0.0243898	3.3207e-05	0.24223	4.25392e-05
fatty acids, from vegetarian oil, at plant	kg	chemicals	organics	0.0283311	0.00568876	2.70417e-05	4.93979e-05
fatty alcohol, from coconut oil, at plant	kg	chemicals	organics	4.72384e-05	8.86232e-06	9.32142e-06	1.21997e-05
fatty alcohol, from palm kernel oil, at plant	kg	chemicals	organics	0.0451027	0.00907025	4.50639e-05	9.49723e-05
fatty alcohol, from palm oil, at plant	kg	chemicals	organics	0.0242965	0.00488581	2.52982e-05	5.25888e-05
fatty alcohol, petrochemical, at plant	kg	chemicals	organics	4.40368e-05	8.3438e-06	8.34144e-06	1.0893e-05
formaldehyde, production mix, at plant	kg	chemicals	organics	4.536e-06	0.000579586	6.16087e-06	0.000582134
formic acid from butane, at plant	kg	chemicals	organics	4.12439e-05	7.5539e-06	1.39224e-05	1.58195e-05
formic acid from methyl formate, at plant	kg	chemicals	organics	6.89772e-05	3.23657e-05	2.19443e-05	4.51289e-05
fraction 1, from naphtha, at plant	kg	chemicals	organics	8.78129e-05	2.0394e-05	3.85634e-05	4.61234e-05
fraction 7, from naphtha, at plant	kg	chemicals	organics	8.78022e-05	2.03915e-05	3.85587e-05	4.61178e-05
fraction 8, from naphtha, at plant	kg	chemicals	organics	8.78103e-05	2.03933e-05	3.85622e-05	4.6122e-05
glycerine, from epichlorohydrin, at plant	kg	chemicals	organics	0.00250329	0.535379	0.395887	0.535396
heptane, at plant	kg	chemicals	organics	8.78144e-05	2.03943e-05	3.8564e-05	4.61242e-05
hexafluorethane, at plant	kg	chemicals	organics	0.00042812	8.17064e-05	7.88945e-05	0.000110298
hexamethyldisilazane, at plant	kg	chemicals	organics	0.00299719	0.00276426	0.00156254	0.00389114
hexane, at plant	kg	chemicals	organics	8.7817e-05	2.03949e-05	3.85652e-05	4.61256e-05
hydrogen cyanide, at plant	kg	chemicals	organics	5.09086e-07	7.31037e-08	5.59373e-07	1.62475e-07
isobutanol, at plant	kg	chemicals	organics	3.18023e-05	5.68896e-06	9.07713e-06	1.02348e-05
isobutyl acetate, at plant	kg	chemicals	organics	7.4604e-05	0.000690654	1.95614e-05	0.000700224
isohexane, at plant	kg	chemicals	organics	0.000178565	0.00970816	0.000112684	0.00973489
isopropanol, at plant	kg	chemicals	organics	2.43724e-05	4.31004e-06	4.4599e-06	5.64685e-06
isopropyl acetate, at plant	kg	chemicals	organics	7.21923e-05	0.000172213	1.73078e-05	0.000180137
maleic anhydride from catalytic oxidation of benzene, at plant	kg	chemicals	organics	0.0154095	0.00379946	0.0153928	0.00379993
maleic anhydride from the direct oxidation of n-butane, at plant	kg	chemicals	organics	7.19241e-05	1.31729e-05	2.88564e-05	3.22962e-05
maleic anhydride, at plant	kg	chemicals	organics	0.00390632	0.0139597	0.00386983	0.0139742
melamine, at plant	kg	chemicals	organics	0.000139764	2.5886e-05	3.04432e-05	3.73045e-05
methanol, at plant	kg	chemicals	organics	6.19666e-06	1.08001e-06	3.37159e-06	3.12887e-06
methanol, at regional storage	kg	chemicals	organics	1.08797e-05	0.000511604	4.2334e-06	0.000514147
methyl acetate, at plant	kg	chemicals	organics	4.12455e-05	7.5542e-06	1.3923e-05	1.58202e-05
methyl acrylate, at plant	kg	chemicals	organics	0.00102973	3.6136	0.000531032	0.00289027
methyl ethyl ketone from butane, at plant	kg	chemicals	organics	4.12475e-05	7.55447e-06	1.39237e-05	1.58192e-05
methyl ethyl ketone, at plant	kg	chemicals	organics	1.98244e-05	3.40702e-06	2.75902e-06	3.75094e-06
methyl formate, at plant	kg	chemicals	organics	6.3483e-05	0.000566627	1.90974e-05	0.000577301
methyl methacrylate, at plant	kg	plastics	monomers	5.50416e-07	8.34478e-08	4.70672e-07	1.88384e-07
methyl tert-butyl ether, at plant	kg	chemicals	organics	0.0365902	0.0552333	0.0365718	0.0552343
methyl-3-methoxypropionate, at plant	kg	chemicals	organics	0.0008122	2.7724	0.000411238	0.00236778
methylamine, at plant	kg	chemicals	organics	5.28899e-05	0.000594684	1.51648e-05	0.00060219
methylchloride, at plant	kg	chemicals	organics	1.37381e-07	1.70456e-08	2.22568e-07	3.61399e-08
methylchloride, at regional storage	kg	chemicals	organics	9.70731e-06	0.00880268	3.58824e-06	0.00880484
methylcyclohexane, at plant	kg	chemicals	organics	4.11448e-05	0.00376243	0.000399127	0.00116202
methylcyclohexane, from naphtha, at plant	kg	chemicals	organics	8.78139e-05	2.03942e-05	3.85637e-05	4.61239e-05
methylcyclopentane, from naphtha, at plant	kg	chemicals	organics	8.78145e-05	2.03943e-05	3.85641e-05	4.61243e-05
methylene diphenyl diisocyanate, at plant	kg	plastics	monomers	4.32119e-07	6.36868e-08	4.34344e-07	1.44296e-07
monochlorobenzene, at plant	kg	chemicals	organics	0.00962704	0.00237324	0.00959163	0.00237435
monochloropentafluoroethane, at plant	kg	chemicals	organics	0.00042813	8.17083e-05	7.88963e-05	0.0001103
monoethanolamine, at plant	kg	chemicals	organics	0.0235693	1.24906e-05	0.110176	1.91541e-05
N,N-dimethylformamide, at plant	kg	chemicals	organics	6.31514e-05	0.000258739	1.59329e-05	0.000266491
nitrobenzene, at plant	kg	chemicals	organics	0.00995137	0.0024511	0.0099096	0.00245436
N-methyl-2-pyrrolidone, at plant	kg	chemicals	organics	0.50936	0.00434166	0.000991225	0.00435003
n-olefins, at plant	kg	chemicals	organics	2.81246e-05	5.31219e-06	5.14202e-06	6.69757e-06
o-dichlorobenzene, at plant	kg	chemicals	organics	0.00962674	0.00237317	0.00959133	0.00237428
paraffin, at plant	kg	chemicals	organics	2.39922e-05	4.97332e-06	5.1056e-06	6.93956e-06
p-dichlorobenzene, at plant	kg	chemicals	organics	0.00962628	0.00237306	0.00959088	0.00237417
penta-erythritol, at plant	kg	chemicals	organics	1.0321	0.0208183	0.00440882	0.0208225
pentane, at plant	kg	chemicals	organics	6.33879e-08	1.01442e-08	4.25263e-08	2.35608e-08
phenol, at plant	kg	chemicals	organics	0.0137997	0.00443175	0.0137561	0.00648351
phosgene, liquid, at plant	kg	chemicals	organics	6.27057e-05	1.28923e-05	1.28427e-05	1.82166e-05
phthalic anhydride, at plant	kg	chemicals	organics	0.000375627	0.00817409	0.000355959	0.000680074
polyols, at plant	kg	plastics	monomers	1.78655e-06	2.90198e-07	1.03454e-06	6.71566e-07
polyvinylfluoride film, at plant	kg	chemicals	organics	0.635693	0.000141082	0.635488	0.000164196
polyvinylfluoride, at plant	kg	chemicals	organics	0.263374	3.71235e-05	0.263196	5.54888e-05
polyvinylfluoride, dispersion, at plant	kg	chemicals	organics	0.540425	0.000168533	0.540201	0.000192724
propanal, at plant	kg	chemicals	organics	7.02929e-05	1.23269e-05	2.33604e-05	2.64783e-05
propylene glycol, liquid, at plant	kg	chemicals	organics	0.009741	0.184711	0.0233024	0.184714
propylene oxide, liquid, at plant	kg	chemicals	organics	0.000106018	1.78601e-05	1.53888e-05	2.14342e-05
propylene, at plant	kg	plastics	monomers	8.24684e-08	1.26858e-08	6.81784e-08	2.90427e-08
propylene, pipeline system, at plant	kg	plastics	monomers	8.0527e-08	1.24432e-08	6.3379e-08	2.83446e-08
refrigerant R134a, at plant	kg	chemicals	organics	0.0089799	0.0288324	0.0218783	0.0288489
sodium formate, reaction of formaldehyde with acetaldehyde, at plant	kg	chemicals	organics	0.182029	0.00367167	0.000777572	0.00367241
sodium methoxide, at plant	kg	chemicals	organics	0.000100354	0.000275444	1.90509e-05	0.000283146
solvents, organic, unspecified, at plant	kg	chemicals	organics	0.0130892	0.0209172	0.0148956	0.0199533
styrene, at plant	kg	plastics	monomers	1.30447e-05	2.13177e-06	5.41596e-06	4.85454e-06
tetrachloroethylene, at plant	kg	chemicals	organics	2.16196e-07	2.9788e-08	2.60774e-07	6.45482e-08
tetrahydrofuran, at plant	kg	chemicals	organics	1.01759	0.00841401	0.00197067	0.00842748
toluene diisocyanate, at plant	kg	plastics	monomers	6.34989e-07	1.03732e-07	4.95005e-07	2.55742e-07
toluene, liquid, at plant	kg	chemicals	organics	6.85194e-08	1.04502e-08	5.9159e-08	2.3861e-08
trichloroethylene, at plant	kg	chemicals	organics	3.00677e-07	4.22635e-08	3.37887e-07	9.19564e-08
trichloromethane, at plant	kg	chemicals	organics	4.94577e-05	1.09746e-05	8.48839e-06	1.3201e-05
trichloropropane, from hypochlorination of allyl chloride, at plant	kg	chemicals	organics	0.000119483	0.0636759	2.66856e-05	0.0636883
triethanolamine, at plant	kg	chemicals	organics	0.0289259	1.30927e-05	0.135268	1.98423e-05
triethylene glycol, at plant	kg	chemicals	organics	0.0450566	1.08456e-05	0.210908	1.11841e-05
triethylene glycol, recycling, at plant	kg	chemicals	organics	4.05926e-05	3.38391e-06	6.05439e-06	5.49872e-06
trifluoromethane, at plant	kg	chemicals	organics	0.0102009	0.0568314	0.0408609	0.0568489
trimethyl borate, at plant	kg	chemicals	organics	5.4321e-05	0.000505221	1.24926e-05	0.000510317
trimethylamine, at plant	kg	chemicals	organics	4.76627e-05	0.00175222	1.32089e-05	0.00175863
urea, as N, at regional storehouse	kg	chemicals	organics	0.913653	0.00756184	0.00177294	0.00757212
vinyl acetate, at plant	kg	plastics	monomers	5.7315e-05	0.000190836	1.30297e-05	0.000196774
vinyl chloride, at plant	kg	plastics	monomers	1.81068e-07	2.69848e-08	1.95159e-07	6.357e-08
vinyl fluoride, at plant	kg	chemicals	organics	0.000170152	2.84625e-05	3.13909e-05	4.00047e-05
xylene, at plant	kg	chemicals	organics	8.25439e-08	1.24102e-08	7.65095e-08	2.82136e-08
